# Supplementary material for: Improved annotation of the insect vector of citrus greening disease: biocuration by a diverse genomics community
Source: Oxford University Press journal article supplement (doi:10.1093/database/bax032), 2017-01-01
Supplement: bax032_supp.zip [file bax032_supp.zip]

**Supplementary Table 5a**

Quality control remark key

| QC remark | Criterion                                                                                        |
|-----------|--------------------------------------------------------------------------------------------------|
| A         | 1. Evidence for 100%+ of exons (RNAseq or proteomics is best, blast hits may be allowed)         |
|           | 2. Final protein length +- 10% of similar gene in related species                                |
|           | 3. Similar exon count/order to gene in related species                                           |
| B         | 1. Evidence for 90%+ of exons (RNAseq or proteomics is best, blast hits may be allowed)          |
|           | 2. Final protein length +- 25% of similar gene in related species                                |
| C         | 1. Evidence for less than 90% of exons (RNAseq or proteomics is best, blast hits may be allowed) |
|           | 2. Final protein length +- 50% of similar gene in related species                                |
| D         | Not accepted in current form                                                                     |

**Supplementary Table 5b**

Gene naming conventions

|   |                                                                                       |
|---|---------------------------------------------------------------------------------------|
| 1 | Use only gene name. Do not add Dcitr to the gene name! It will be done automatically  |
|   | Criterion                                                                             |
| a | Evidence for 100%+ of exons (RNAseq or proteomics is best, blast hits may be allowed) |
| b | Final protein length +- 10% of similar gene in related species                        |
| c | Similar exon count/order to gene in related species                                   |
| 2 | Add "partial" after the gene name in all other cases, especially for misassembly      |
|   | Criterion                                                                             |
| a | Evidence for 90%+ of exons (RNAseq or proteomics is best, blast hits may be allowed)  |
| b | Final protein length +- 25% of similar gene in related species                        |
