# Supplementary material for: Improved annotation of the insect vector of citrus greening disease: biocuration by a diverse genomics community
Source: Oxford University Press journal article supplement (doi:10.1093/database/bax032), 2017-01-01
Supplement: bax032_supp.zip [file bax032_supp.zip]

### Supplementary Table 1

Hemiptera BUSCO markers were selected from 9 species in OTHODBv9.1 and included 3350 genes. The an

Table 1a: Genome

| Data                   | Sequences      | Complete | Fragmented | Missing |
|------------------------|----------------|----------|------------|---------|
| <b>Diaci1.1 genome</b> | <b>161,988</b> | 74.8%    | 0.3%       | 24.9%   |
| <b>Pea aphid v2.3</b>  | <b>31,391</b>  | 21.0%    | 0.0%       | 79.0%   |
| <b>Bed bug v1.1</b>    | <b>41,503</b>  | 83.4%    | 0.3%       | 16.3%   |
| <b>White fly v1.1</b>  | <b>19,761</b>  | 77.9%    | 0.0%       | 22.1%   |

Table 1b: Gene sets and transcriptome

| Data              | Sequences     | Complete | Fragmented | Missing |
|-------------------|---------------|----------|------------|---------|
| <b>OGS v1.0</b>   | <b>21,026</b> | 74.5%    | 0.3%       | 25.2%   |
| <b>MCOT v1.0</b>  | <b>30,562</b> | 92.9%    | 0.1%       | 7.0%    |
| <b>NCBI v100</b>  | <b>20,996</b> | 74.7%    | 0.3%       | 25.0%   |
| <b>Maker v1.1</b> | <b>18,242</b> | 72.3%    | 0.4%       | 27.3%   |
| <b>Egg</b>        | <b>76,467</b> | 71.5%    | 0.2%       | 28.3%   |
| <b>Nymph</b>      | <b>69,175</b> | 71.6%    | 0.1%       | 28.3%   |
| <b>Adult</b>      | <b>62,412</b> | 60.6%    | 0.2%       | 39.2%   |

alysis shows the number of markers present full-length, in fragments and missing from a given dataset.
