# Supplementary material for: Improved annotation of the insect vector of citrus greening disease: biocuration by a diverse genomics community
Source: Oxford University Press journal article supplement (doi:10.1093/database/bax032), 2017-01-01
Supplement: bax032_supp.zip [file bax032_supp.zip]

**Supplementary Table 2**

Overall statistics for each annotation set and related genomes

| Annotation set                        | Gene Models | mRNAs  | Total Number of Exons |
|---------------------------------------|-------------|--------|-----------------------|
| NCBI v100                             | 19,311      | 20,966 | 113,609               |
| MCOT v1.0                             | 30,562      | NA     | NA                    |
| Mapped MCOT v1.0                      | 19,744      | 19,744 | 89,423                |
| Maker v1.1 BCM                        | 18,205      | 18,205 | 94,257                |
| Curated genes                         | 530         | 572    | 3,482                 |
| OGS1.0                                | 19,324      | 21,026 | 117,064               |
|                                       |             |        |                       |
| <i>Drosophila melanogaster</i>        | 13,929      | 30,482 | 77,689                |
| <i>Acyrtosiphon pisum (pea aphid)</i> | 20,958      | 30,790 | 238,155               |
| <i>Oncopeltus fasciatus</i>           | 19,589      | 19,746 | 104,329               |
| <i>Cimex lectularius (bed bug)</i>    | 14,085      | 14,212 | 89,562                |

| Total Number of Introns | Number of Exons Per mRNA | Average mRNA length | Average Exon Length |
|-------------------------|--------------------------|---------------------|---------------------|
| 92,613                  | 5.42                     | 1,317               | 243                 |
| NA                      | NA                       | 1,996               | NA                  |
| 69,679                  | 4.53                     | 1,724               | 381                 |
| 76,052                  | 5.18                     | 1,018               | 197                 |
| 2,910                   | 6.09                     | 1,478               | 243                 |
| 95,050                  | 5.57                     | 1,369               | 246                 |
|                         |                          |                     |                     |
| 58,534                  | 2.55                     | 1,374               | 539                 |
| 206,612                 | 7.73                     | 2,039               | 264                 |
| 84,581                  | 5.28                     | 903                 | 171                 |
| 75,350                  | 6.3                      | 1,211               | 192                 |

| Total Exon length (bp) |
|------------------------|
| 27,605,237             |
| 60,995,906             |
| 34,029,470             |
| 18,536,849             |
| 845,582                |
| 28,784,551             |
|                        |
| 41,874,371             |
| 62,788,971             |
| 17,821,062             |
| 17,206,103             |
