# Supplementary material for: Improved annotation of the insect vector of citrus greening disease: biocuration by a diverse genomics community
Source: Oxford University Press journal article supplement (doi:10.1093/database/bax032), 2017-01-01
Supplement: bax032_supp.zip [file bax032_supp.zip]

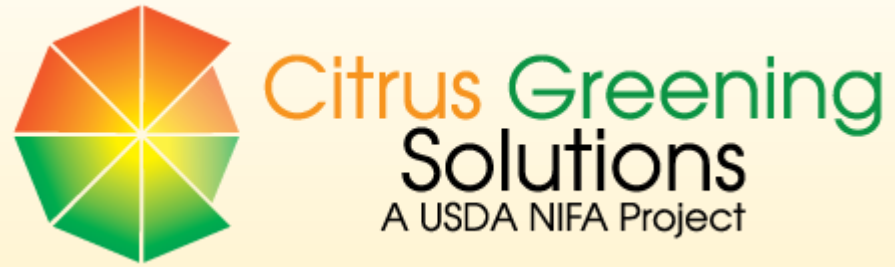

# Annotation Tutorial:

## *Diaphorina citri* genome

Indian River State College, FL

# Websites you will need

Basecamp: <https://basecamp.com/>

Apollo: <https://apollo.nal.usda.gov/diacit/sequences>

i5k Blast or hmmer: <https://i5k.nal.usda.gov/webapp/blast/>  
<https://i5k.nal.usda.gov/webapp/hmmer/>

NCBI Blast: <https://blast.ncbi.nlm.nih.gov/Blast.cgi>

MCOT database: [https://citrusgreening.org/tools/blast?db\\_id=27](https://citrusgreening.org/tools/blast?db_id=27)

# Chose Gene or Gene family from Basecamp

Basecamp 2 Projects Calendar Everything Progress Everyone Me

New features Sign out

Jump to a project, person, label, or search...

## Psyllid Genome Annotation

[See all text documents](#)

### SODs annotation

#### Superoxide Dismutases

Please select a gene family for annotation

SODs Mn-Fe (6 Orthologs)- Chris Cordola

SODs Cu-Zn (14 Orthologs) -Krystal Villalobos

Now with BedBug *Cimex lectularius* genes

You can find protein sequence fasta files at

[ftp://ftp.citrusgreening.org/annotation/curated\\_orthologs/SODs/](ftp://ftp.citrusgreening.org/annotation/curated_orthologs/SODs/)

Annotated *Dm-Ag-Aa-Cp* Trees

[http://cegg.unige.ch/files/insecta/immunodb/1/FAMILY\\_DATA/SOD/SODs\\_gapless\\_N...](http://cegg.unige.ch/files/insecta/immunodb/1/FAMILY_DATA/SOD/SODs_gapless_N...)

Add your annotated psyllid proteins and location from WebApollo to this Google doc in fasta format (please follow the Dcitr naming convention)

<https://docs.google.com/document/d/1EPmQsH9OT-o30pttDSALdBOEaKfHfYLZ9GlqFgA8...>

Source:

- Expert annotations for *D. melanogaster*, *A. gambiae*, *A. aegypti* and *C. quinquefasciatus* <http://cegg.unige.ch/insecta/immunodb>

### Want to make changes?

Edit this document

Prashant Hosmani was the last person to edit this document on Oct 8, 2015  
([See what changed](#)).

#### Version history

Prashant H. Oct 8 at 12:47pm

Prashant H. Sep 18 at 3:46pm

Prashant H. Sep 18 at 3:44pm

Prashant H. Sep 18 at 3:44pm

Christopher C.  
Sep 18 at 11:56am

Krystal V. Sep 17 at 11:22pm

Prashant H.  
Sep 16 at 12:16pm

Prashant H.  
Sep 16 at 12:14pm

[Delete...](#)

| Name                               | Size   | Date Modified        |
|------------------------------------|--------|----------------------|
| <a href="#">[parent directory]</a> |        |                      |
| <a href="#">SOD_Cu-Zn.faa</a>      | 4.3 kB | 10/8/15, 12:00:00 AM |
| <a href="#">SOD_Mn-Fe.faa</a>      | 2.1 kB | 10/8/15, 12:00:00 AM |
| <a href="#">SODs_readme.txt</a>    | 1.1 kB | 9/16/15, 12:00:00 AM |

This page will take you to orthologous sequences & Gene family description

## Orthologs

>Flyb:SOD2 Flyb:N1308 CG11793-PA Sod Cu-Zn Dm\_Sod 'SOD-Cu-Zn'  
MVVAVCVINGDAKGTVFEEQSSGTPVKVSGEVCGLAKGLHGHHVHEFGDNTNGCMSSG  
PHFNIPYGEHGAPODENRHLGDLNIEATGDCPTKVNITDSKITLFGADSIIIGRTVVVHA  
DADDLGGGHELSKSTGNAGARIGCGVIGIAKV

>Flyb:SOD3 Flyb:N12721 CG9027-PA Cu-Zn Dm\_no\_name 'SOD-Cu-Zn'  
MMQYLVVSLALCATICSAQAQTRNMPQIAIAYLIGPVQSDNTQVKGNTVFTQNDCCQNVHV  
RVQLEGLKEGKHGHHIHEKGDLTNGCISMGHAYNPDKVDHGGPDHEVRHVGDLNLEANS  
TGIIDVTYTDQVITLTKLGIIGRGVVHELEDDLGNHTDSKKTGNAGRIACGVIGI  
K

>Flyb:SOD4 Flyb:N10352 CG5948-PA Cu-Zn Dm\_no\_name 'SOD-Cu-Zn'  
MLIKLILALVIGYGGIFAPGSAQNLLDRLRPVNMTRFDDGKVVSGTKVRYERLTVPLG  
GPVGPIGAAGLLGPLLPQPSYLYTYQLVQWQAGAKLMDGDEGAGVAGMISFVQLPYN  
SDIRVTINVTGLPPGKHALHIHTFGDLSDGCKSTGGQFPNNFLGNVDTKDDGGSISAVFS  
IYVLFGINGIVGRSIVHSAIDLNTALNAEVFSSSLQAMPNPLAYQNEENSLGPAIAC  
GVISIMSTAASSSGMATAAPPAMENPEI

>Agam:SOD2 Agam:N13914 ENSANGG00000013675 ENSANGP00000016164 SOD3a Ag\_CuSOD3-A 'SOD-Cu-Zn'  
MPLKAVCVLNGEVKGTIFFEQSGSDPVKVTGSVTLKPKDGHGHHIHEFGDNTNGCMSTG  
AHFNPYAKTHGGPDAAERHAGDMGNIIVADENGEAKVDLTATQIALSGALNVVGRSLVVHA  
DPDDLGVGGHELSKTTGNAGARLACGVIGLCKI

>Agam:SOD3 Agam:N13914 ENSANGG00000013675 ENSANGP00000032094 SOD3b Ag\_CuSOD3-B 'SOD-Cu-Zn'  
MPLKAVCVLNGEVKGTIFFEQSGSDPVKVTGSVTLKPKDGHGHHIHEFGDNTNGCMSTG  
YNPNGNDHGAPODDANCHVGDLNIVAYSTGLAKTIQIANKKLTLVGDRSIIIGRTLSISEYE  
DDLGRGKHDSYKTTGNSGNCIACIIGVAREEYFAERLHLTTDE

>Agam:SOD4 Agam:N22525 ENSANGP00000015824 gene:ENSANGG00000013335 transcript:ENSANGT00000015824 S  
MPLKAVCVLNGEVKGTIFFEQSGSDPVKVTGSVTLKPKDGHGHHIHEFGDNTNGCMSTG  
KHGHHIHEKGDLTGDCASTGGHYNPDKVSHGAPNDQVRHVGDLNIAADENGIKTSYSD  
TVVSLYGARSVIGRAIVIAEVDDLKGTNHPDSLKTGNAGGRVACGVIGILEPDEPDSE  
CSSGQGLLPAAVTVVFSLLLTRSVWL

>Agam:SOD5 Agam:N22962 ENSANGP00000019828 gene:ENSANGG00000017339 transcript:ENSANGT00000019828 A  
MRRCPAVVGTLCVPEPSWKVGATLVADNPEQQIMGTISFRQWAPGHVQTAINVTGLPVG  
KHAVHVAHFADMGREGCKSTGPHFRSSIIIGNEVKEDGNAMIDFHSPIYINLFGFAGIVGRS  
IIVHEKPSSEVYRFPDLSINNPISFQGEEDTVGARIACGLITILDNVAP

>Aaeg:SOD3 Aaeg:N31871(supercontig\_1.5:1342653-1363914)=Aaeg:N34696(supercontig\_1.584:422035-4224  
MPAKAVCVLNGEVKGTIFFEQSGSDPVKVTGSVTLKPKDGHGHHIHEFGDNTNGCMSTG  
PHFNIPYGEHGAPODDANCHVGDLNIVADGSGVAKVDISDSQISLGPILSILGRTVVVHA  
DPDDLGLGGHELSKSTGNAGARLACGVIGICKA

Test **ALL** orthologous sequences one by one  
in Apollo (Next slide)

# “Blat” sequences in Apollo

Menu bar: Click Tools > Search Sequence

- Enter orthologous sequence (not in FASTA)
- Indicate nucleotide or protein
- Click Search

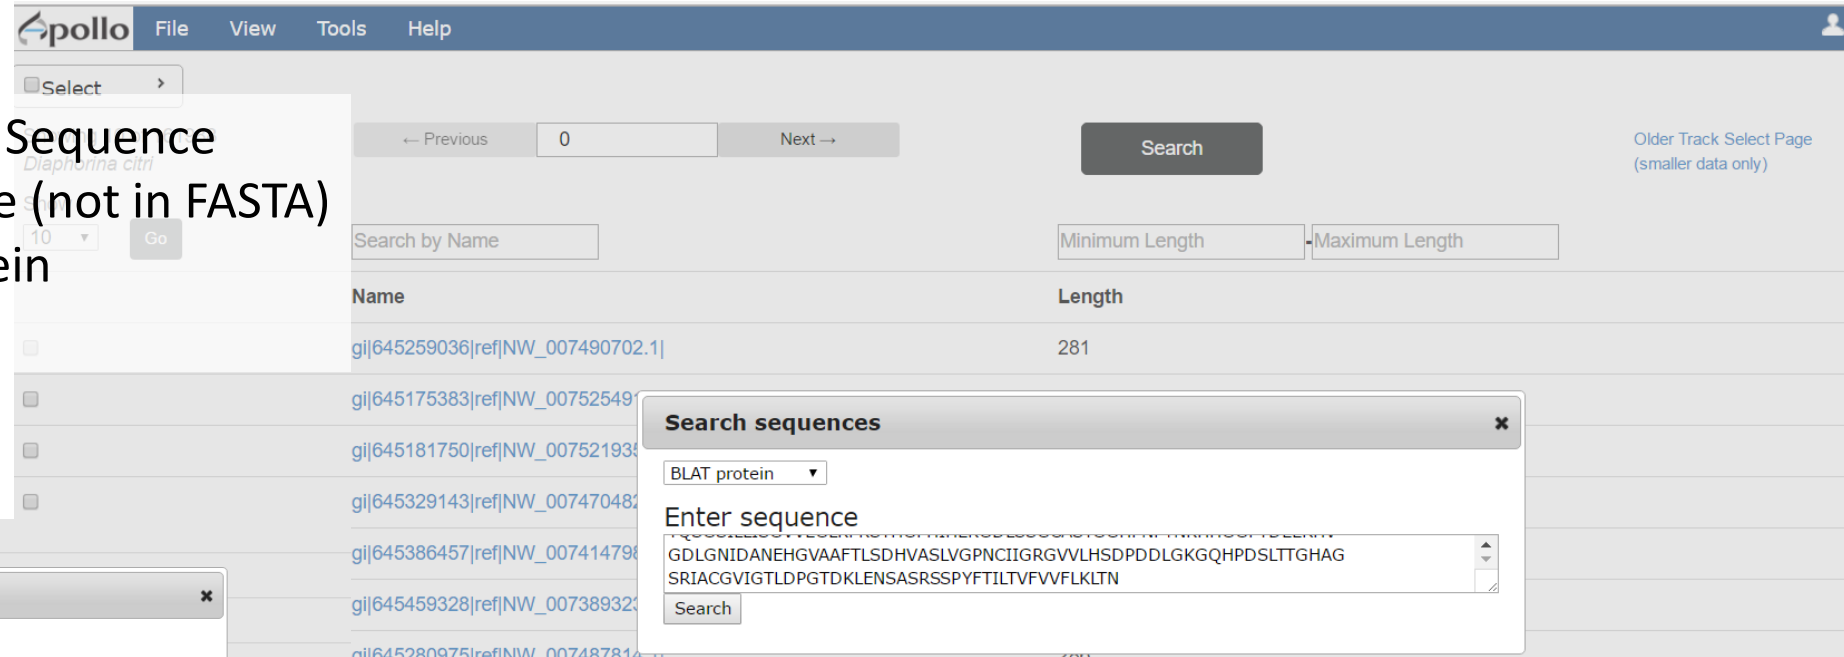

Search sequences

BLAT protein

Enter sequence

GDLGNIDANEHGVAFTLSDHVASLVGPNCIIGRGVVLHSDPDDLGGKQHPDSLTTGHAG  
SRIACGVIGTLDPGTDKLENSASRSPYFTILTIVFVFLKLTN

Search

| ID                  | Start  | End    | Score | Significance | Identity |
|---------------------|--------|--------|-------|--------------|----------|
| gi 645507... 168511 | 168265 | 168265 | 109   | 3.4e-24      | 60.98    |
| gi 645198... 73     | 214    | 214    | 72    | 8e-13        | 68.09    |
| gi 645508... 280480 | 280339 | 280339 | 72    | 6.1e-13      | 68.09    |
| gi 645508... 280294 | 280156 | 280156 | 65    | 1e-10        | 69.57    |
| gi 645501... 26459  | 26381  | 26381  | 49    | 0.0000039    | 76.92    |
| gi 645507... 169877 | 169805 | 169805 | 48    | 0.000011     | 83.33    |
| gi 645507... 172471 | 172399 | 172399 | 48    | 0.000011     | 83.33    |
| gi 645507... 167898 | 167865 | 167865 | 21    | 1100         | 90.91    |
| gi 645501... 24943  | 24919  | 24919  | 14    | 180000       | 87.5     |

Change to BLAT protein if using a protein sequence (most often).

Be sure to check “search all genome sequences” if you want anything not already on your page.

Insert the letter sequence only. Do not use the > or any spaces.

Results in different scaffolds

- Look at all scaffolds
- Significance that is very low and Score that is high is ideal
- **\*Remember\*** Test all orthologs given from basecamp

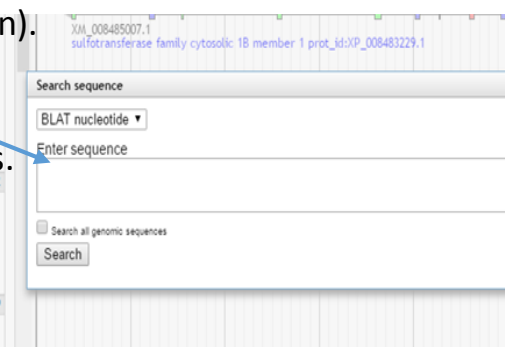

# Apollo Search Results

Score: A number that the BLAT results “scores” the hit. The higher is often better, but not always. There is a balance with score and Significance.

Significance: The “E-value” given by the BLAT results. The smaller the number is often better, but not always. There is a balance with Score and Significance.

ID: The scaffold location

Start or End : The number where the sequence starts or ends

Identity: How well the sequence entered matches the location of the scaffold.

| ID            | Start         | End           | Score         | Significance  | Identity             |
|---------------|---------------|---------------|---------------|---------------|----------------------|
| gi 6455066... | 143862        | 143634        | 165           | 5.8e-41       | 100                  |
| 141257        | 141047        | 155           | 4.9e-38       | 100           | gi 6455066... 142334 |
| 142142        | 143           | 2.8e-34       | 98.44         | gi 6455066... | 143078 142907        |
| 123           | 2e-28         | 100           | gi 6455066... | 124686        | 124563 86            |
| 3.7e-17       | 97.56         | gi 6455066... | 141949        | 141838        | 80 2.1e-15           |
| 100           | gi 6453697... | 2             | 107           | 79            | 4.7e-15 100          |
| gi 6455066... | 144400        | 144289        | 76            | 3.1e-14       | 100                  |
| 138371        | 138260        | 69            | 6.9e-12       | 89.19         | gi 6452510... 280    |
| 193           | 67            | 2.7e-11       | 96.55         | gi 6453555... | 10190 10277          |
| 55            | 8.8e-8        | 96.55         | gi 6455077... | 172463        | 172346 54            |
| 2e-7          | 64.1          | gi 6455049... | 5657          | 5540          | 51 0.000001          |
| 58.97         | gi 6455066... | 147551        | 147671        | 48            | 0.000015 52.5        |
| gi 6455066... | 147725        | 147788        | 43            | 0.00038       | 85.71 gi 6455066...  |
| 126119        | 126065        | 42            | 0.00065       | 100           | gi 6455066... 127962 |

This example shows the columns out of place, this may happen, The ID section starts with gi.

Choose a scaffold. By clicking on it. You can then X out of the dialog box.

# If Apollo says “No matches found”

Use i5k Blast

i5k@NAL Tools About Us Contact

**BLAST Databases**

**Organisms**

- ☐ *Ceratitis capitata*
- ☐ *Cimex lectularius*
- ☐ *Copidosoma floridanum*
- ☐ *Diachasma alloeum*
- ☒ *Diaphorina citri*
- ☐ *Drosophila biarmipes*
- ☐ *Drosophila bipectinata*
- ☐ *Drosophila elegans*
- ☐ *Drosophila eugracilis*
- ☐ *Drosophila ficusphila*
- ☐ *Drosophila kikkawai*
- ☐ *Drosophila rhopaloea*

**Diaphorina citri**

**Nucleotide**

- ☐ Genome Assembly - NCBI-diaci1.1 (Current RefSeq assembly version)
- ☐ Genome Assembly - diaci1.1 (Legacy assembly version)
- ☐ Transcript - Diacit International psyllid consortium transcripts\_v1
- ☐ Transcript - Diacit RefSeq transcripts\_Release\_100

**Peptide**

- ☒ Protein - Diacit International psyllid consortium proteins\_v1
- ☒ Protein - Diacit RefSeq proteins\_Release\_100

**Query Sequence**

Your sequence is detected as peptide:

V  
GDLGNIDANEHGVAFTLSDHVASLVGPN  
CIIGRGVVLHSDPDDLKGQHPDSLTTGH  
AG  
SRIACGVIGTLDPGTDKLENSASRSPYFTIL  
TVFVFLKLTN

Or load it from disk

Choose File No file chosen

**Program**

☐ blastn ☐ tblastn ☐ tblastx ☒ blastp ☐ blastx

Reset Search

Indicate organism

Indicate protein  
(if applicable)

Enter sequence

Results

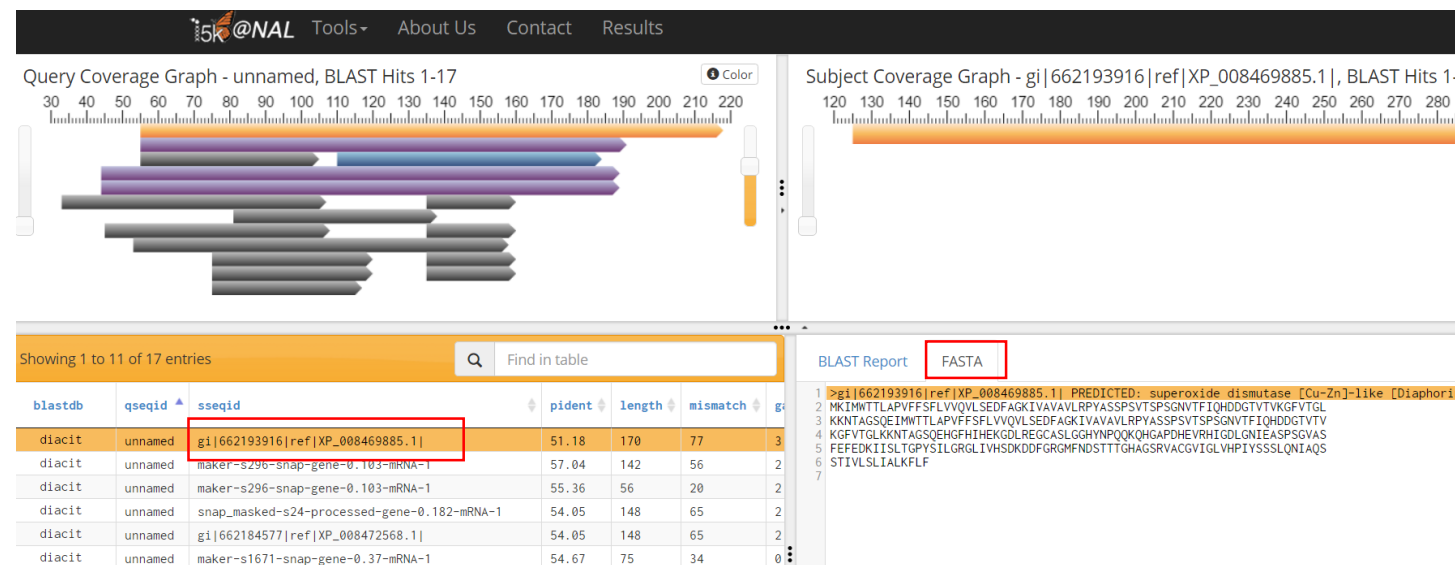

- Chose best result(s) (Low e-value, best coverage, etc.)
- Copy sequence and Blat in Apollo.

## Apollo Blat vs i5k Blast

- Apollo Blat is more “sensitive” than i5k Blast.
- i5k Blast will broaden the search.

# If Apollo says “No matches found”

Search your sequence on *D. citri* MCOT database

[https://citrusgreening.org/tools/blast?db\\_id=27](https://citrusgreening.org/tools/blast?db_id=27) **BLAST**

**Input parameters**

**Categories** Psyllid Databases

**Database** Diaphorina citri MCOT proteins [db details](#)

**Program** blastp (protein to protein db) [Show example](#)

**Query** autodetect

MTSESYKLFVESHPRFTTFSNYSLLKSYERPRCHFVFTLAQEHRVAKLVGPNVSGNITF  
TQSGSILLISGVVEGLKPKSTHGFHIEKGDLSGCASTGGHFNPNKHHGGPTDEERHV  
GDLGNIDANEHGVAFTLSDHVASLVGPNCIIGRGVVLHSDPDDLKGKQHPDSLTTGHAG  
SRIACGVIGTLDPGTDKLENSASRSPYFTILTVFVFLKLTN

**BLAST**

Indicate MCOT protein DB

Indicate blastp, blastn, etc.

Your sequence

## Results

**Results**

Untitled\_sequence vs Diaphorina citri MCOT proteins

| SubjectId                      | id%   | Aln    | eval  | Score | Description                                                                                                 |
|--------------------------------|-------|--------|-------|-------|-------------------------------------------------------------------------------------------------------------|
| <a href="#">MCOT10235.0.MM</a> | 57.04 | 81/142 | 1e-48 | 163   | Superoxide dismutase [Cu-Zn]   Similar to C4WTR6   *-*-   PANTHER PTHR10003   Pfam PF00080 Length = 274     |
| <a href="#">MCOT13840.0.CO</a> | 55.10 | 81/147 | 2e-46 | 157   | Superoxide dismutase [Cu-Zn]   Similar to A0A023FAY3   ***-   PANTHER PTHR10003   Pfam PF00080 Length = 238 |
| <a href="#">MCOT16518.0.CC</a> | 54.05 | 80/148 | 5e-44 | 148   | Superoxide dismutase [Cu-Zn]   Similar to R4V538   ***-   PANTHER PTHR10003   Pfam PF00080 Length = 155     |

Click for sequence, and blat on Apollo

# If Apollo says “No matches found”

Search your sequence in i5k blast hmmer (hidden Markov model) created from a multiple sequence alignment of the ortholog proteins

<https://i5k.nal.usda.gov/webapp/hmmer/>

HMMER

Organisms

- ☐ *Cimex lectularius*
- ☐ *Copidosoma floridanum*
- ☐ *Diachasma alloeum*
- ☒ *Diaphorina citri*
- ☐ *Drosophila biarmipes*
- ☐ *Drosophila bipectinata*
- ☐ *Drosophila elegans*
- ☐ *Drosophila eugracilis*
- ☐ *Drosophila ficusphila*
- ☐ *Drosophila kikkawai*
- ☐ *Drosophila rhopaloa*
- ☐ *Drosophila takahashii*

Diaphorina citri

Protein

- ☒ Protein - Diacit\_RefSeq\_proteins\_Release\_100
- ☒ Protein - Diacit\_International\_psyllid\_consortium\_proteins\_v1

Query Sequence / Multiple sequence alignment

Your sequence is detected as fasta:

```
MTSESYKLFVESHPRFTTFSNYSLKSYERPRCHFVFTLAQEHRAVAKLVGPNVSGNITF
TQSGSILLISGVVEGLKPKSTHGFHIHEKGDLSGGCASTGGHFNPNYKHHGGPTDEERHV
GDLGNIDANEHGVAFTLSDHVASLVGPNCIIIGRGVVLHSDPDDLGGQHPDSLTTGHAG
SRIACGVIGTLDPGTDKLENSASRSPYFTILTTFVFLKLTN
```

Tutorial

<https://i5k.nal.usda.gov/webapp/hmmer/manual/>

On Apollo, once you have selected a scaffold.

Be sure that the items you want to view are chosen on the left side of the screen. For the psyllid, we start to base our models off of NCBI predictions. Be sure the following gene sets are chosen.

☐ OrthoDB8 orthologous proteins (Toll, IMD, JAKSTAT) tBLASTN

▼ 2. NCBI-RefSeq Annotation Release 1004

▼ 1. Gene Sets4

▼ Noncoding1

☒ NCBI Predicted noncoding RNA, Annotation Release 100

▼ Protein Coding2

☒ NCBI Predicted low-quality protein coding genes, Annotation Release 100

☒ NCBI Predicted protein coding genes, Annotation Release 100

▼ Pseudogenes1

☐ NCBI Predicted pseudogenes, Annotation Release 100

☐ Whole insect reverse-translated peptides (RTPs) from mass spectrometry (MS) proteomics data

▼ 4. Transcriptome10

▼ Coverage Plots (BigWig)5

☐ Control adult and nymph psyllids (Vyas 2015; Coverage Plot)

☐ Infected adult and nymph psyllids (Vyas 2015; Coverage Plot)

☐ RNAseq reads from adult tissue (Coverage Plot)

☐ RNAseq reads from egg tissue (Coverage Plot)

☐ RNAseq reads from nymph tissue (Coverage Plot)

▼ Mapped Reads5

☒ Control adult and nymph psyllids (Vyas 2015)

☒ Infected adult and nymph psyllids (Vyas 2015)

☐ RNAseq reads from adult tissue

☐ RNAseq reads from egg tissue

☐ RNAseq reads from nymph tissue

▼ 5. DNaseq2

▼ Coverage Plots (BigWig)1

☐ Summary plot for DNaseq paired-end reads

▼ Mapped Reads1

☐ Alignment plot for DNaseq paired-end reads

We will base our models off of RNAseq data, so be sure to choose some tracks under **Mapped Reads** as well.

Note: Be sure to check all RNAseq data, but it may overload the system if they are all turned on at once.

# Predicted Gene Models

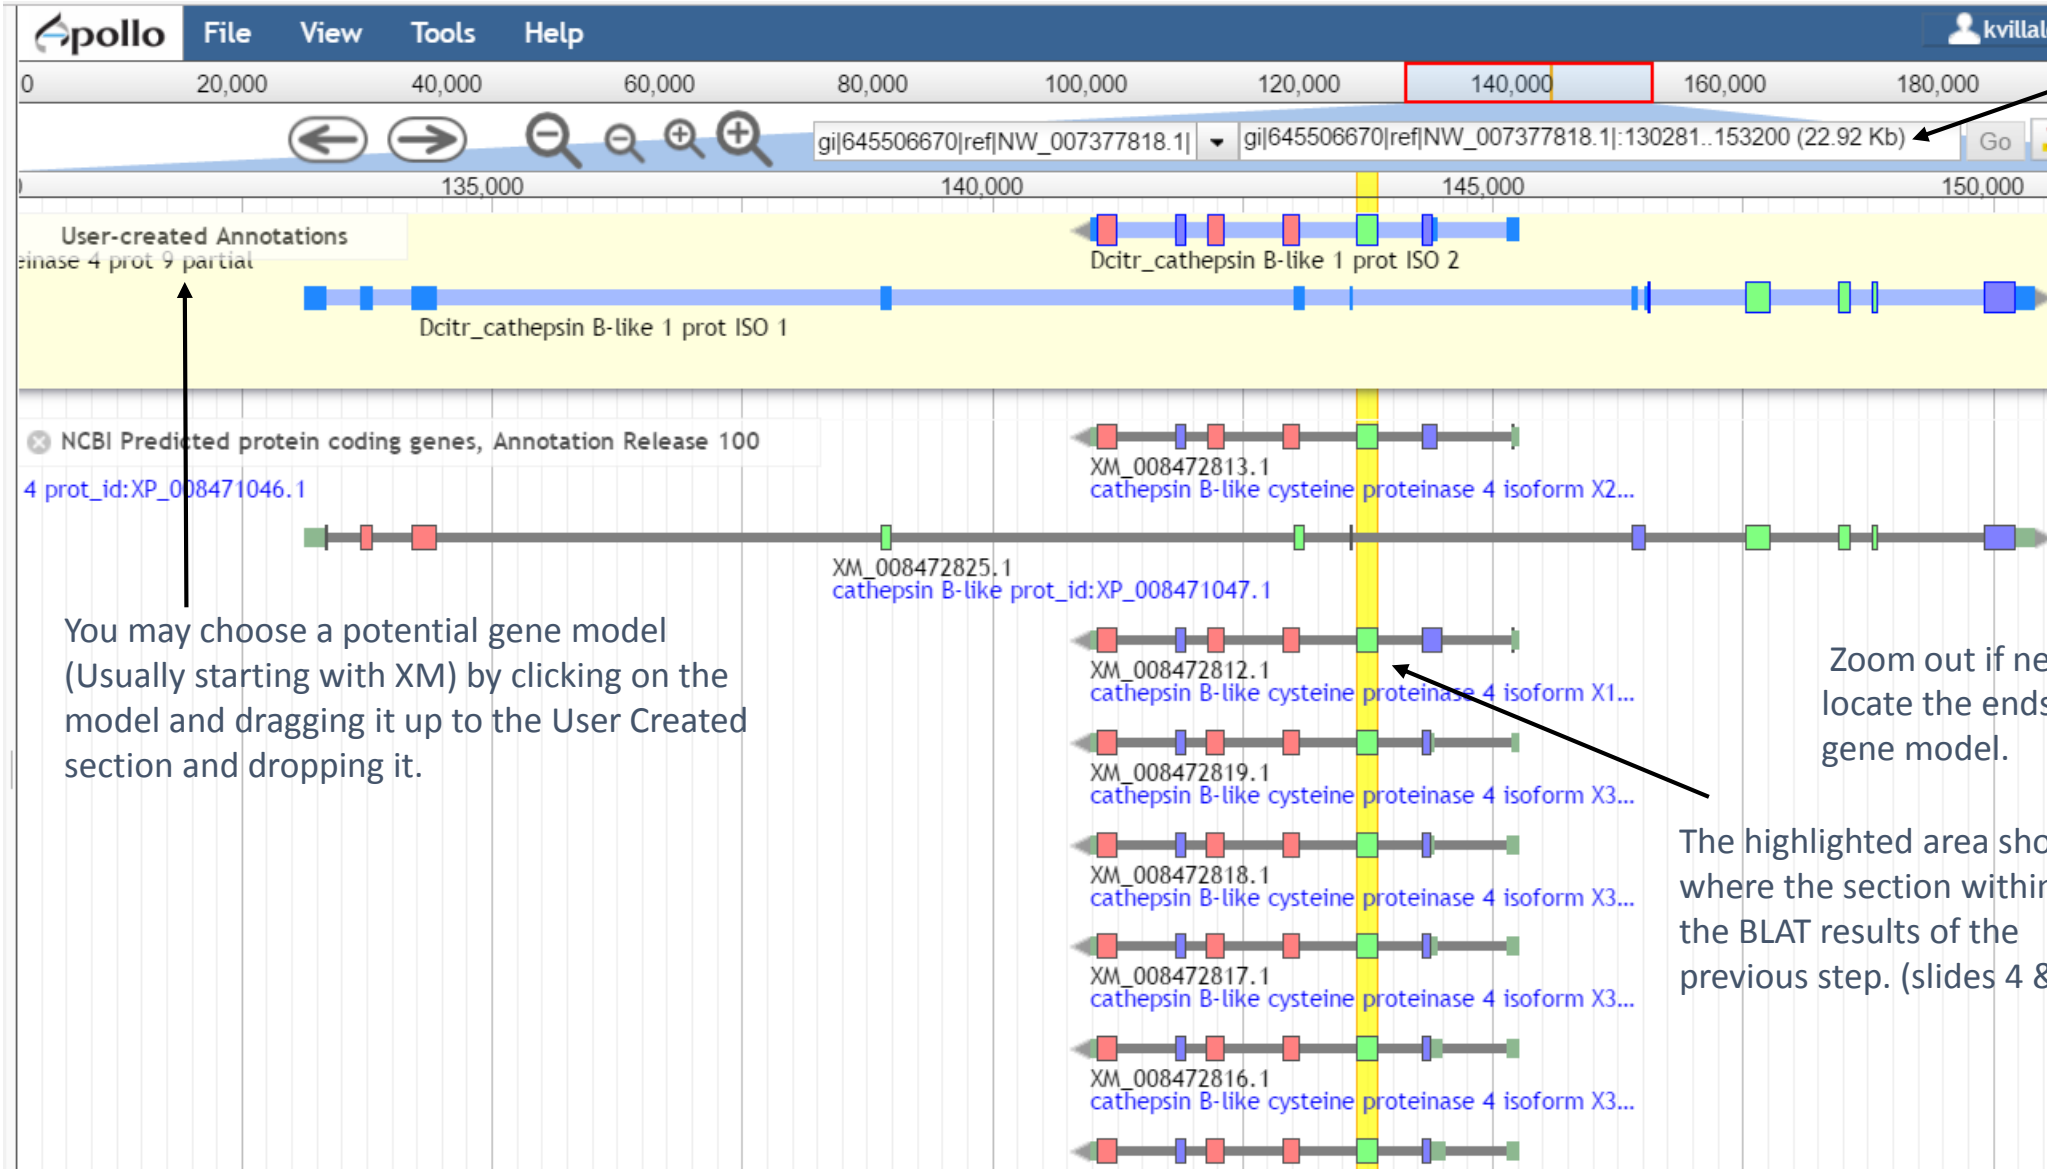

**\*Useful tip\*:** You can use this as an “URL” in Apollo. As you need to look at all scaffolds (BLAT results), use this URL to organize all your potential gene models and to get back to them.

You may choose a potential gene model (Usually starting with XM) by clicking on the model and dragging it up to the User Created section and dropping it.

Zoom out if need be and locate the ends of a potential gene model.

The highlighted area shows where the section within the BLAT results of the previous step. (slides 4 & 5)

# Check Gene Models

Right click on the model in the User Created section and choose “Get sequence”

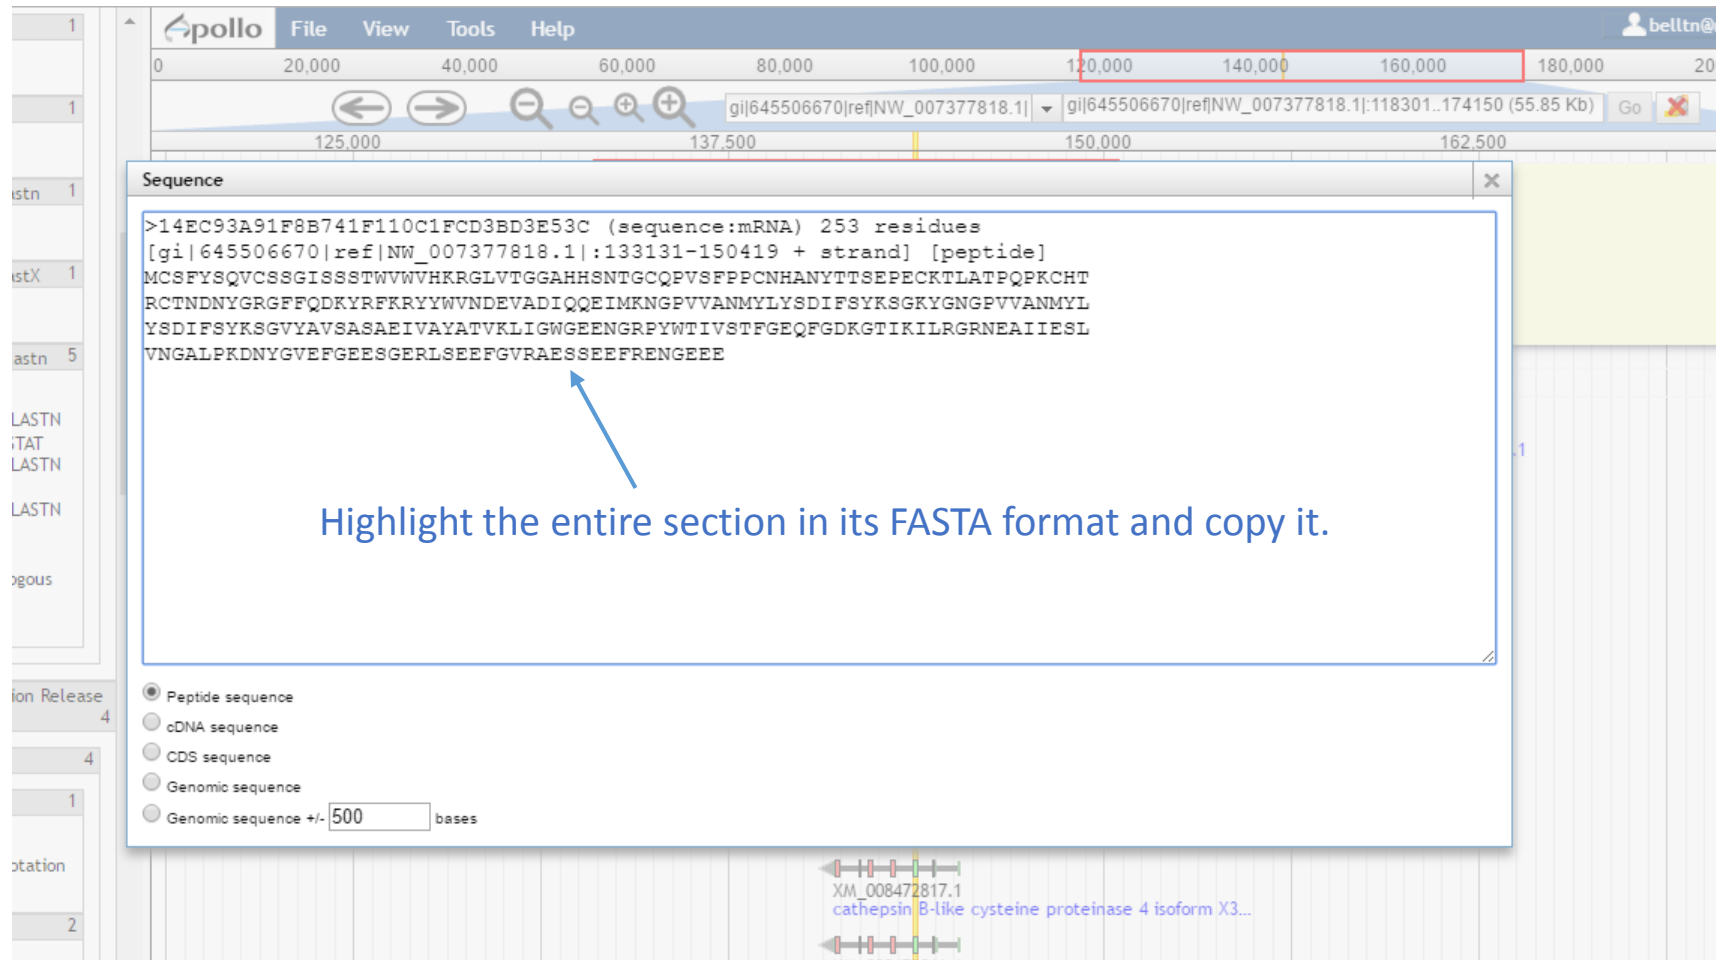

The screenshot displays the Apollo genome browser interface. At the top, a navigation bar includes 'File', 'View', 'Tools', and 'Help' menus, along with a user profile icon labeled 'belltn@n'. Below this is a genomic track with a scale from 0 to 200,000. A specific region is highlighted with a red box, corresponding to the coordinates 'gi|645506670|ref|NW\_007377818.1|:118301..174150 (55.85 Kb)'. A 'Sequence' window is open, showing the following FASTA-formatted sequence:

```
>14EC93A91F8B741F110C1FCD3BD3E53C (sequence:mRNA) 253 residues  
[gi|645506670|ref|NW_007377818.1|:133131-150419 + strand] [peptide]  
MCSFY8QVCSSGSISSSTWVWVHKRGLVTGGAHHSNTGCQPVSFPPCNHANYTTSEPECKTLATPQPKCHT  
RCTNDNYGRGFFQDKYRFKRYWVNDEVADIQQEIMKNGPVVANMYLYSDIFS YKSGKYNGP VVANMYL  
YSDIFS YKSGVYAVSASAEIVAYATVKLIGWGEENGRPYWTIVSTFGEQFGDKGTIKILRGRNEAIIESL  
VNGALPKDNYGVVEFGESGERLSEEFQVRAESSEEFRENGEEE
```

A blue arrow points to the sequence text, and a text box overlay reads: 'Highlight the entire section in its FASTA format and copy it.' Below the sequence, there are radio buttons for selecting the type of sequence: 'Peptide sequence' (selected), 'cDNA sequence', 'CDS sequence', 'Genomic sequence', and 'Genomic sequence +/- 500 bases'.

# Protein BLAST

← → ↻ Secure | [https://blast.ncbi.nlm.nih.gov/Blast.cgi?PAGE=Proteins&PROGRAM=blastp&PAGE\\_TYPE=BlastSearch&BLAS](https://blast.ncbi.nlm.nih.gov/Blast.cgi?PAGE=Proteins&PROGRAM=blastp&PAGE_TYPE=BlastSearch&BLAS)

NIH U.S. National Library of Medicine NCBI National Center for Biotechnology Information

**BLAST** » **blastp suite**

### Standard Protein BLAST

blastn blastp **blastx** tblastn tblastx

BLASTP programs search protein databases using a protein query.

**Enter Query Sequence**

Enter accession number(s), gi(s), or FASTA sequence(s) [Clear](#) [Query subrange](#)

From

To

Or, upload file  No file chosen

Job Title

Enter a descriptive title for your BLAST search

☐ Align two or more sequences

**Choose Search Set**

Database

Organism  ☐ Exclude

Enter organism common name, binomial, or tax id. Only 20 top taxa will be shown.

☐ Models (XM/XP) ☐ Uncultured/environmental sample sequences

Entrez Query  [YouTube](#) [Create custom database](#)

Enter an Entrez query to limit search

**Program Selection**

Algorithm ☒ blastn (protein-protein BLAST)

Use blastp for protein BLAST

Enter the FASTA sequence into the appropriate box, choose any selection / parameters. And press BLAST at the bottom.

Indicate "Insecta". This will limited your search to insects only.

NIH U.S. National Library of Medicine NCBI National Center for Biotechnology Information

**BLAST** » **blastp suite** » RID-9UERZDMB015 [Home](#)

[\[Formatting options\]](#) **Format Request Status**

Job Title: 14EC93A91F8B741F110C1FCD3BD3E53C (sequence:mRNA)...

|                       |                          |
|-----------------------|--------------------------|
| Request ID            | 9UERZDMB015              |
| Status                | Searching                |
| Submitted at          | Thu Feb 9 23:01:03 2017  |
| Current time          | Thu Feb 09 23:01:15 2017 |
| Time since submission | 00:00:09                 |

This page will be automatically updated in 2 seconds

BLAST is a registered trademark of the National Library of Medicine

**NCBI**

National Center for Biotechnology Information, U.S. National Library of Medicine  
8600 Rockville Pike, Bethesda MD, 20894 USA

[Policies and Guidelines](#) | [Contact](#)

# The NCBI Results Page

Job title: CAA8EC20D7495772A225C37C77071736 (sequence:mRNA)...

RID [AA3YKJER015](#) (Expires on 02-17 09:34 am)

Query ID [lcl|Query\\_6881](#)  
Description CAA8EC20D7495772A225C37C77071736 (sequence:mRNA) 374 residues [gi|645505060|ref|NW\_007378205.1|:108329-117924 + strand]  
Molecule type amino acid  
Query Length 374

Database Name nr  
Description All non-redundant GenBank CDS translations+PDB+SwissProt+PIR+PRF excluding environment  
Program BLASTP 2.6.1+ [Citation](#)

The top portion gives information on the searched sequence

Other reports: [Search Summary](#) [Taxonomy reports](#) [Distance tree of results](#) [Multiple alignment](#)

## Graphic Summary

### Show Conserved Domains

Putative conserved domains have been detected, click on the image below for detailed results.

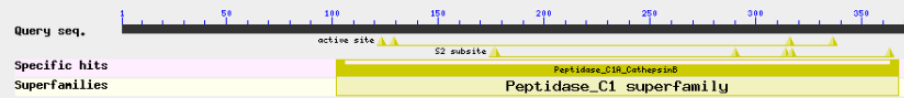

The NCBI conserved domains database is used to identify the conserved domains in the orthologs and candidate genes.

Distribution of the top 101 Blast Hits on 100 subject sequences

Mouse over to see the title, click to show alignments

Color key for alignment scores

■ <40 ■ 40-50 ■ 50-80 ■ 80-200 ■ >=200

Query 1 70 140 210 280 350

Query= your sequence

Results

You can see how the results align with your sequence

- [PREDICTED: cathepsin B-like cysteine proteinase 4 \[Diosphoria citri\]](#)
- [cathepsin B \[Ripioratus pedestris\]](#)
- [PREDICTED: cathepsin B-like isoform X1 \[Halvonomorpha halys\]](#)
- [cathepsin B \[Ripioratus pedestris\]](#)
- [cathepsin B-like cysteine protease \[Tritoma infestans\]](#)
- [PREDICTED: cathepsin B-like \[Cimex lectularius\]](#)
- [PREDICTED: cathepsin B-like \[Cimex lectularius\]](#)
- [hypothetical protein q.26476 \[Graphocephala atropunctata\]](#)
- [PREDICTED: cathepsin B-like isoform X1 \[Cimex lectularius\]](#)
- [PREDICTED: cathepsin B-like isoform X2 \[Cimex lectularius\]](#)
- [hypothetical protein q.21611 \[Homalodisca illurala\]](#)
- [PREDICTED: cathepsin B \[Tribolium castaneum\]](#)

|  | score | score | score | value |                              |
|--|-------|-------|-------|-------|------------------------------|
|  | 786   | 786   | 99%   | 0.0   | 100% <a href="#">XP_0084</a> |
|  | 248   | 248   | 92%   | 4e-78 | 40% <a href="#">BAN203</a>   |
|  | 238   | 238   | 94%   | 6e-74 | 39% <a href="#">XP_0142</a>  |
|  | 237   | 237   | 95%   | 1e-73 | 39% <a href="#">BAN214</a>   |
|  | 235   | 235   | 94%   | 8e-73 | 38% <a href="#">ABD353</a>   |
|  | 234   | 234   | 91%   | 2e-72 | 39% <a href="#">XP_0142</a>  |
|  | 234   | 234   | 92%   | 3e-72 | 38% <a href="#">XP_0142</a>  |
|  | 234   | 234   | 94%   | 3e-72 | 38% <a href="#">JAT2482</a>  |
|  | 233   | 233   | 94%   | 6e-72 | 38% <a href="#">XP_0142</a>  |
|  | 232   | 232   | 94%   | 7e-72 | 39% <a href="#">XP_0142</a>  |
|  | 232   | 232   | 94%   | 1e-71 | 37% <a href="#">JAT0683</a>  |
|  | 231   | 231   | 94%   | 3e-71 | 37% <a href="#">XP_9742</a>  |

# The NCBI Results Page cont'd

## Pairwise Alignment

cathepsin B-348 precursor [Acyrtosiphon pisum]

Sequence ID: [ref|NP\\_001119608.1|](#) Length: 342 Number of Matches: 1

[▶ See 1 more title\(s\)](#)

Range 1: 9 to 341 [GenPept](#) [Graphics](#)

▼ Next Match ▲ Previous Match

| Score         | Expect                                                        | Method                       | Identities   | Positives    | Gaps       |
|---------------|---------------------------------------------------------------|------------------------------|--------------|--------------|------------|
| 229 bits(583) | 5e-68                                                         | Compositional matrix adjust. | 132/346(38%) | 180/346(52%) | 17/346(4%) |
| Query 1       | MIHILVFLG---CTLVRGELYKFSDAYIDQINREANTWTAGRNFPANLSEELYRQFLIA   | 57                           |              |              |            |
|               | ++ +L+F G VR +L SD +ID IN W+AGRNF + Y++ +                     |                              |              |              |            |
| Sbjct 9       | LVGLLIFSFRVDGATVRVDLNPISDEFIDHINSIQYYWSAGRNFHKDTPISYIKGLMGV   | 68                           |              |              |            |
| Query 58      | DAKYFDQSDRPLPGDRKTYDPEYSATVPDRFDAREQWPNCGTIGHVPDTGACAAPHIFAA  | 117                          |              |              |            |
|               | K ++ P TY+ + S +P+ FDARE+WPNC TI V D G+C + F A                |                              |              |              |            |
| Sbjct 69      | HEK---NAEYPKLEQLLTYN-DASTDLPETFDARERWPNCPTIREVRDQSGSCGSCWAFGA | 124                          |              |              |            |
| Query 118     | VGAFSDDRCIKSKGQNRPLSTEYVASCKICRYDDNKSCSHGVSFRTWNFLHKRGSVTG    | 177                          |              |              |            |
|               | V A SDR CI S G +N S E + SCC C + C+ G WN+ +G V+G               |                              |              |              |            |
| Sbjct 125     | VEAMSDRVCIHSGTKNFHFSANLVSCCWTGCF----GCNGGFPGAAWNYYWTKGIVSG    | 180                          |              |              |            |
| Query 178     | GDYGDRTGCQPSTISPCSHHGSAPTLPSCENQKVPKLCCHTRCTNPTYGRGFFQDKHRTT  | 237                          |              |              |            |
|               | G YG GC P I+PC HH + P E K P C +C Y + QD H                     |                              |              |              |            |
| Sbjct 181     | GPYGSNMGCIPYEIAPCEHVNTRGPCKEKGKTP--TCVKKCEE-GYKVPYAQDLHHGK    | 237                          |              |              |            |
| Query 238     | LTYWDDNEDAIKKEILAHGPTTATFALYDDFYHYKSGVYKHTSNAKLENYLHSGKLIGW   | 297                          |              |              |            |
|               | Y + ++ D I++EI +GP F +Y+DF Y++GVYKH + L H+ +++GW              |                              |              |              |            |
| Sbjct 238     | SAYSIRNDVDQIRQEITYTNGPVEGAFTVYEDFIAYRAGVYKHVAGKALGG--HAIRILGW | 295                          |              |              |            |
| Query 298     | GTENG-TPYWLVTWGPVWGRGTGTVKILRGKYECAFELYLIAAGKP                | 342                          |              |              |            |
|               | G +NG PYWLV N+W WG G KILRG EC E I AG P                        |                              |              |              |            |
| Sbjct 296     | GVQNGEIPYWLVAWSWNTDWGSDGFFKILRGSDGEGIEGQINAGLP                | 341                          |              |              |            |

You can see how similar your gene model is to other similar genes in related organism(s), by clicking on each result (previous slide).

Example: The gene model is 38% identical and 52% similar to gene in *A. pisum*.

Or check gene model by using

# NCBI Smart BLAST

[https://blast.ncbi.nlm.nih.gov/smartblast/?LINK\\_LOC=BlastHomeLinkn](https://blast.ncbi.nlm.nih.gov/smartblast/?LINK_LOC=BlastHomeLinkn)

Smart BLAST will provide a phylogenetic tree with model organisms.

**SMARTBLAST** >> Formatting Results - AR10PXJC011

[Home](#) [Help](#)

**Summary** [Report description](#)

Query: unnamed protein product

Query length: 399 aa Identical to: [ref|XP\\_008476619.1](#)

**DOMAINS:** Cathepsin B group and 1 other(s)

Cysteine PRotase related

cathepsin B1, isoform A

Your query: PREDICTED: cathepsin B-like isoform X2

cathepsin B precursor

cathepsin B isoform 1 preproprotein

cathepsin B preproprotein

[See full multiple alignment](#) [Legend](#)

**Conserved domains within the sequences**

Green: subject sequences

Yellow: your sequence (query)

**Phylogenetic tree**

Caenorhabditis elegans

fruit fly

Asian citrus psyllid

zebrafish

human

house mouse

[About the database](#)

**Descriptions**

**Best hits**

Select: [All](#) [None](#) Selected: 0

[Alignments](#) [GenPept](#)

| Description                                                        | Max score | Total score | Query cover | E value | Ident | Accession                      |
|--------------------------------------------------------------------|-----------|-------------|-------------|---------|-------|--------------------------------|
| <a href="#">cathepsin B1, isoform A [Drosophila melanogaster]</a>  | 345       | 345         | 86%         | 4e-116  | 51%   | <a href="#">NP_572920.1</a>    |
| <a href="#">cathepsin B precursor [Danio rerio]</a>                | 337       | 337         | 79%         | 2e-113  | 50%   | <a href="#">NP_998501.1</a>    |
| <a href="#">cathepsin B isoform 1 preproprotein [Homo sapiens]</a> | 316       | 316         | 79%         | 9e-105  | 48%   | <a href="#">NP_001899.1</a>    |
| <a href="#">cathepsin B preproprotein [Mus musculus]</a>           | 309       | 309         | 79%         | 4e-102  | 48%   | <a href="#">NP_031824.1</a>    |
| <a href="#">Cysteine PRotase related [Caenorhabditis elegans]</a>  | 279       | 279         | 79%         | 5e-90   | 44%   | <a href="#">NP_001123113.1</a> |

Sequence name that corresponds to sequences on right.  
(hover over to get more details)

More info. on query vs model organisms.

End of page would be BLASTp results.

# RNASeq Data

To view gene model in different colors indicating the diff. frames: (As seen)  
Click View, Color by CDS frame.

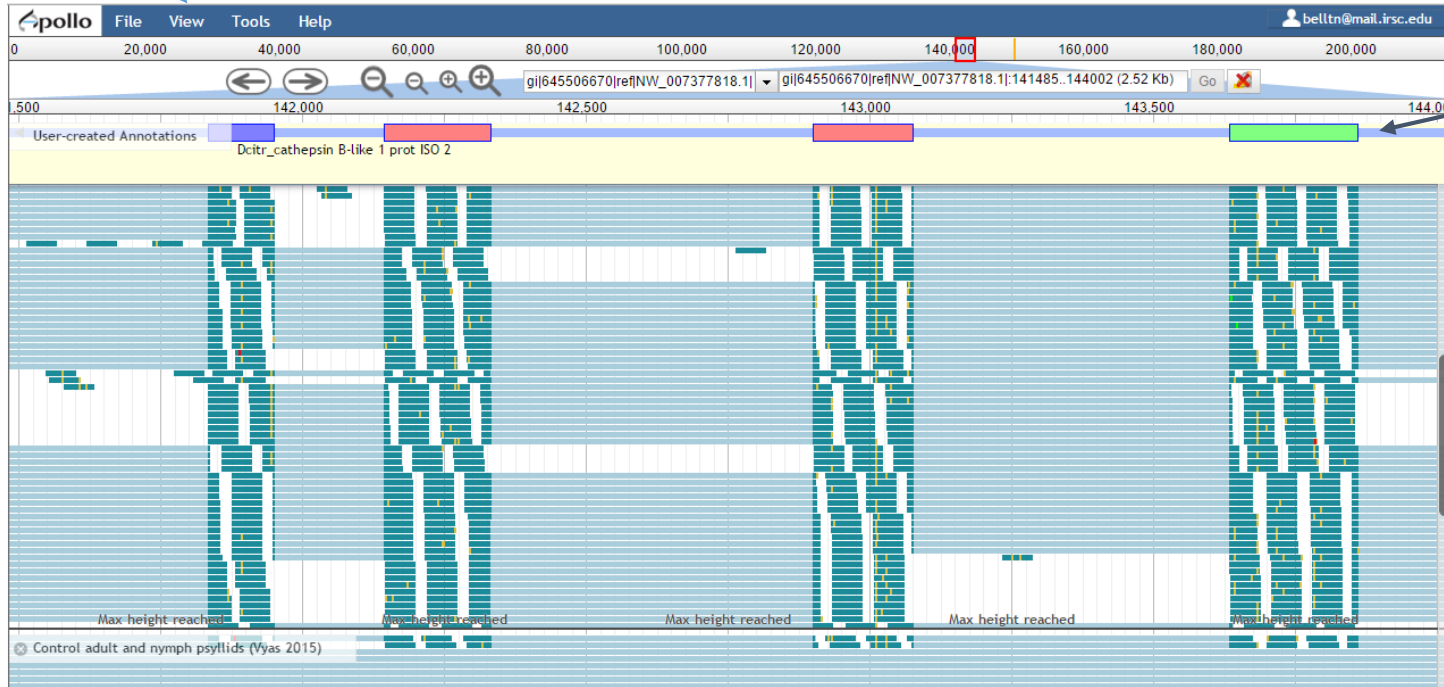

The colored outlined boxes represent exons, while the thin blue lines connecting them represent introns. The blue boxes without an outline represent UTRs

Look closely at the results and see how they line up with RNASeq data. You may have to zoom in close and look by sections.

Dark blue RNA seq reads indicate evidence for exons and light blue for introns.

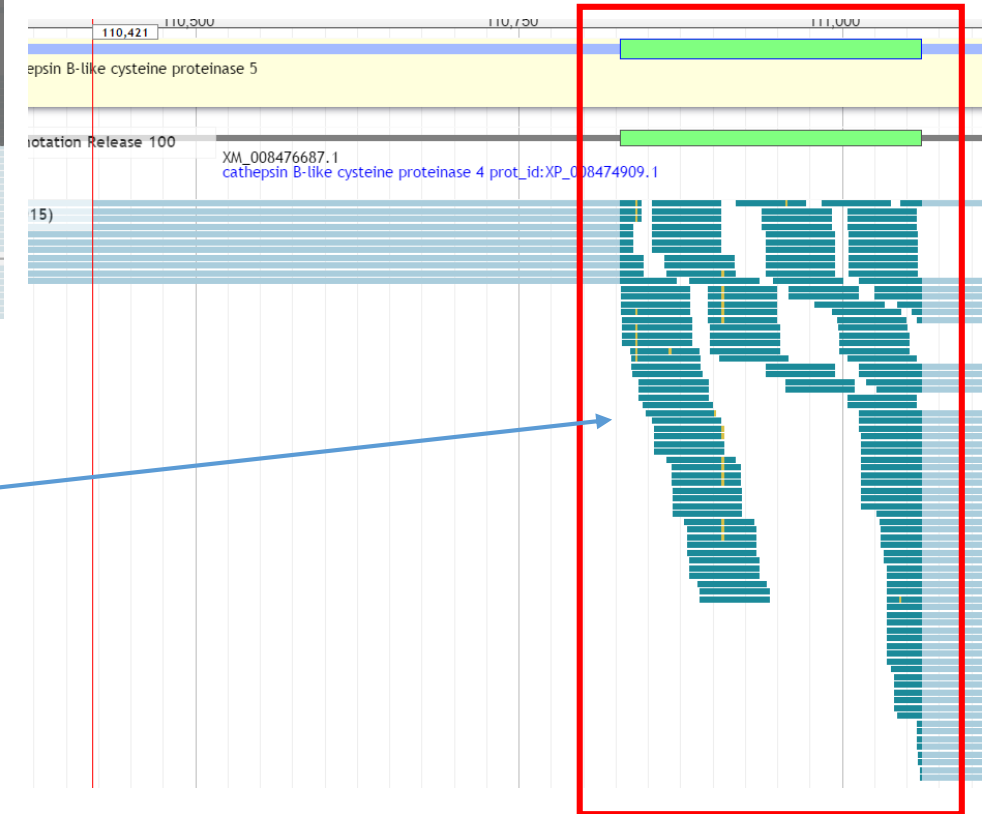

# RNASeq Data

## More details

You can also view the RNAseq Coverage Plots.  
(On the left side on Apollo (Available Tracks))

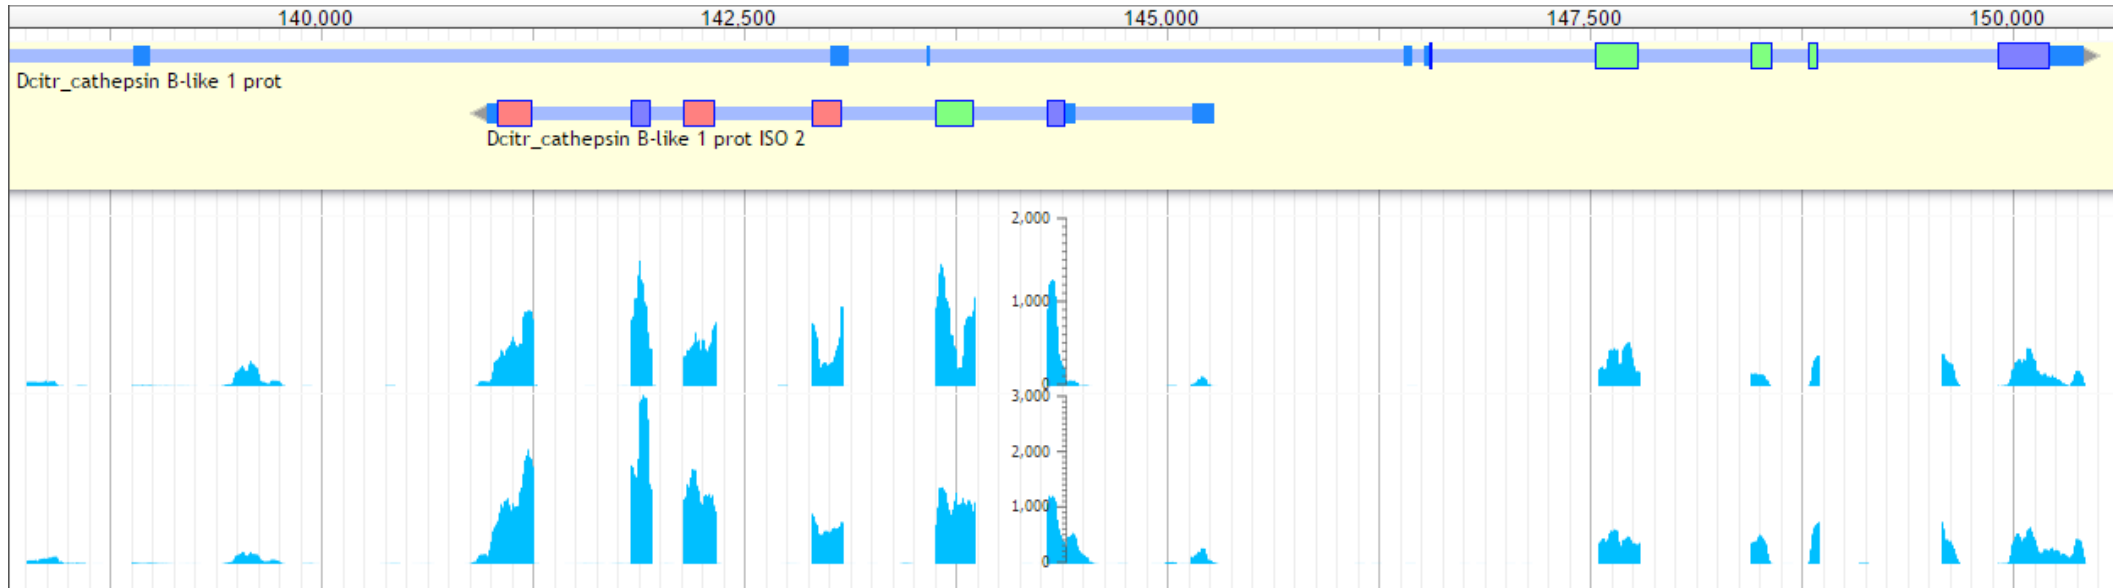

If you zoom in and see letters, this is the reference sequence, as shown here. You can view stops on the different frames by an \*.

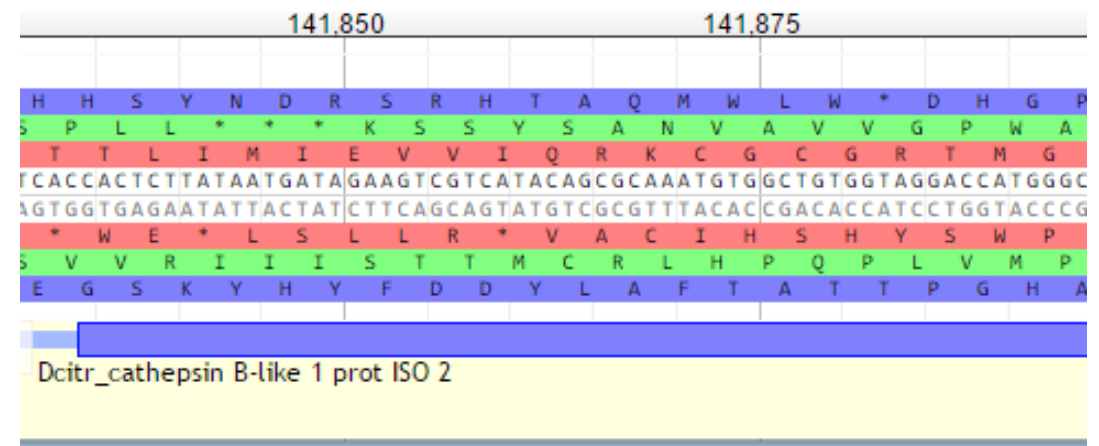

# Making Edits

## Matching Data

Delete exons, or UTR (Untranslated region)

Merge exons, or gene models

Split

Duplicate

Make Intron

Set to Downstream Splice Donor

Set to Upstream Splice Donor

Set to Downstream Splice Acceptor

Set to Upstream Splice Acceptor

View History

Indicates which direction  
(Upstream or Downstream)  
the sequence is reading.  
In this case = downstream (-)  
strand

UTR's are dark blue and are on the 5' and 3' ends of the gene model.

Example: This is the 3' UTR of the gene model

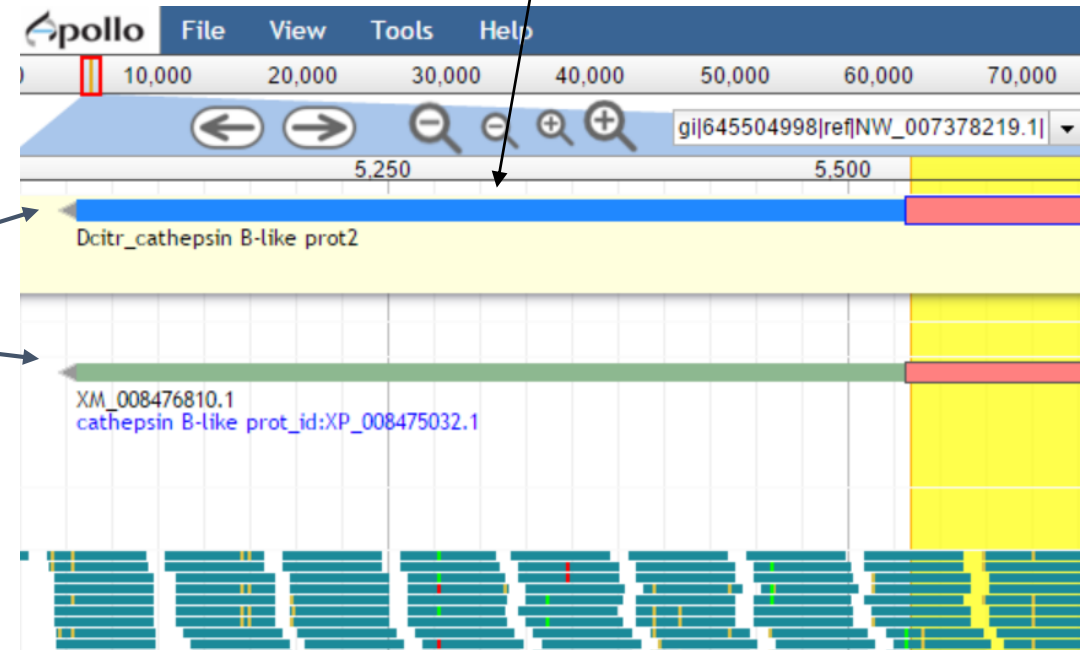

## Important:

### Splice sites:

Reverse (-) strand gene model:

3' acceptor of intron, GA

5' donor of intron, TG, CG

Positive (+) strand gene model:

3' acceptor of intron, AG

5' donor of intron, GT, GC

Make sure your gene model starts with ATG (M)  
and ends with TAG, TGA, or TAA (stop codons).

# Fixing splice sites

## Splice sites:

Reverse (-) strand gene model:

3' acceptor of intron, GA

5' donor of intron, TG, CG

Positive (+) strand gene model:

3' acceptor of intron, AG

5' donor of intron, GT, GC

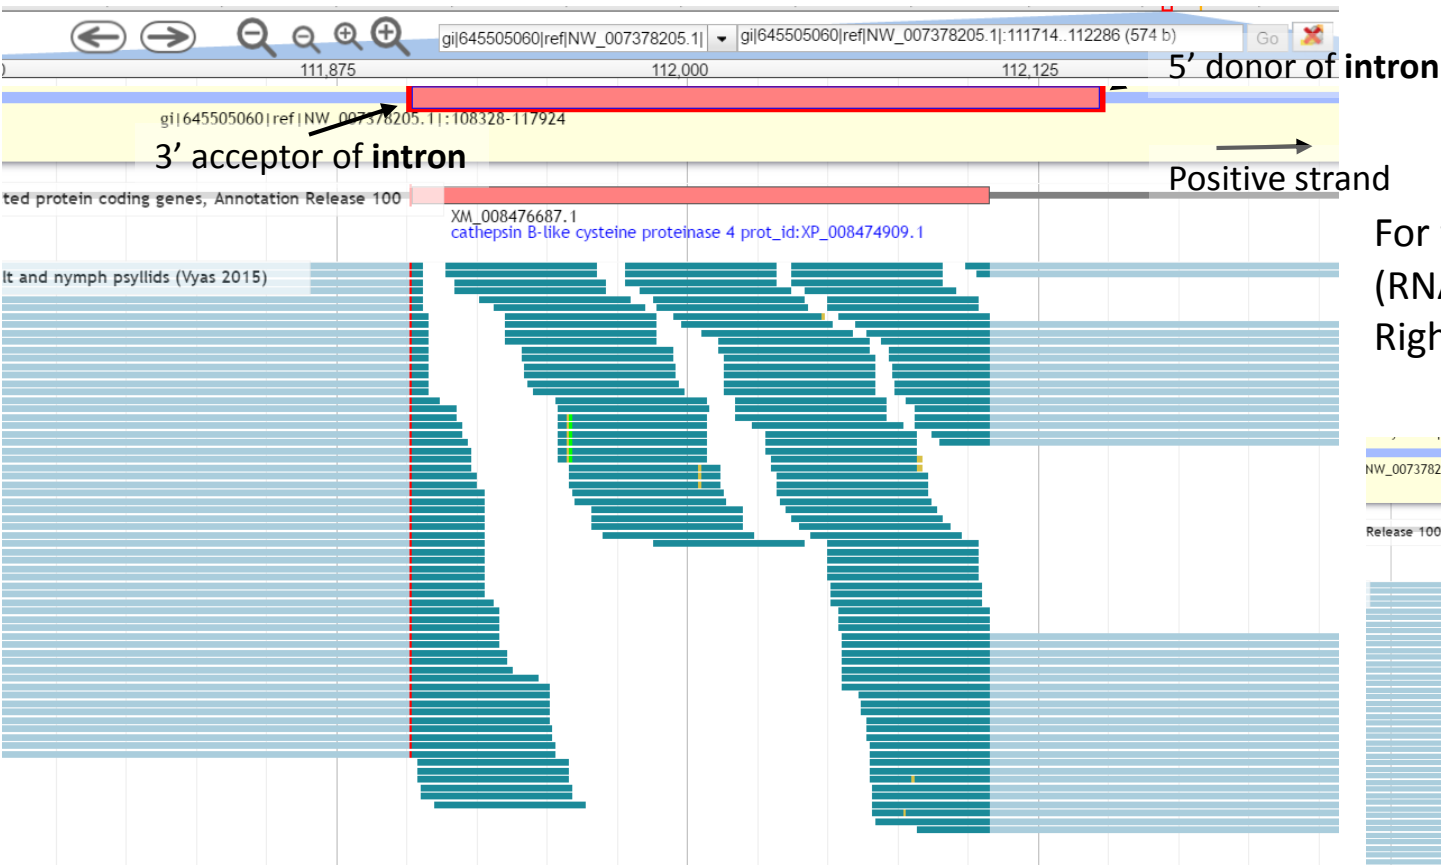

For this example, the donor would be moved upstream.  
(RNAseq evidence to do so)

Right click exon, Set to upstream splice donor.

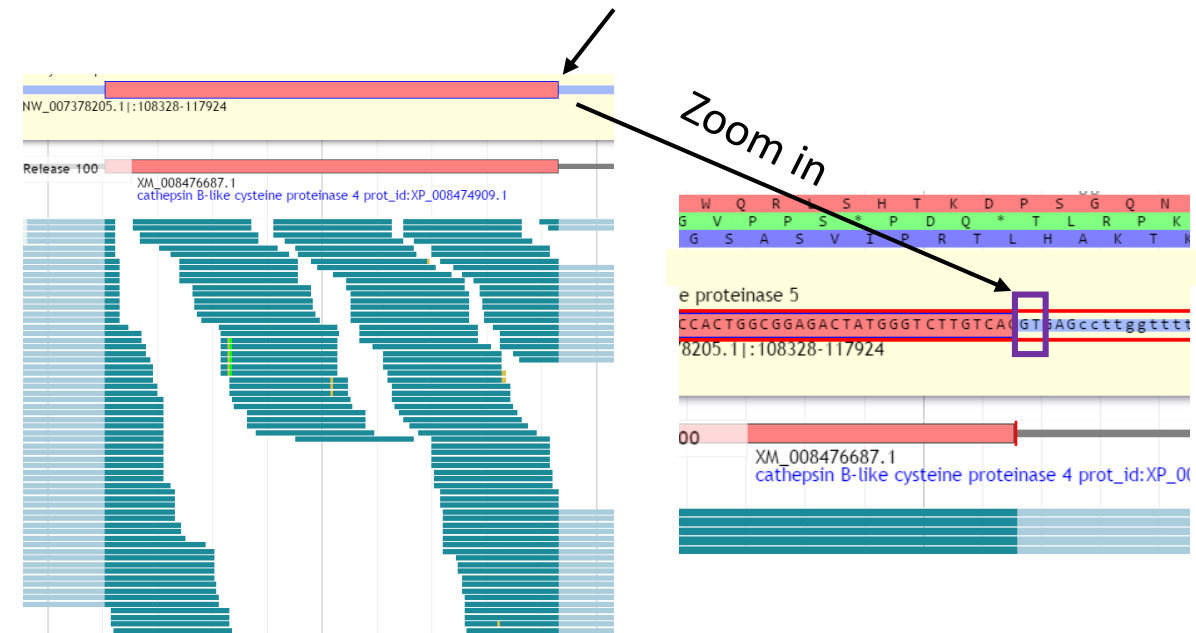

# Adding an exon

Other gene predictions can be used, not limited to, Maker, augustus, snap.

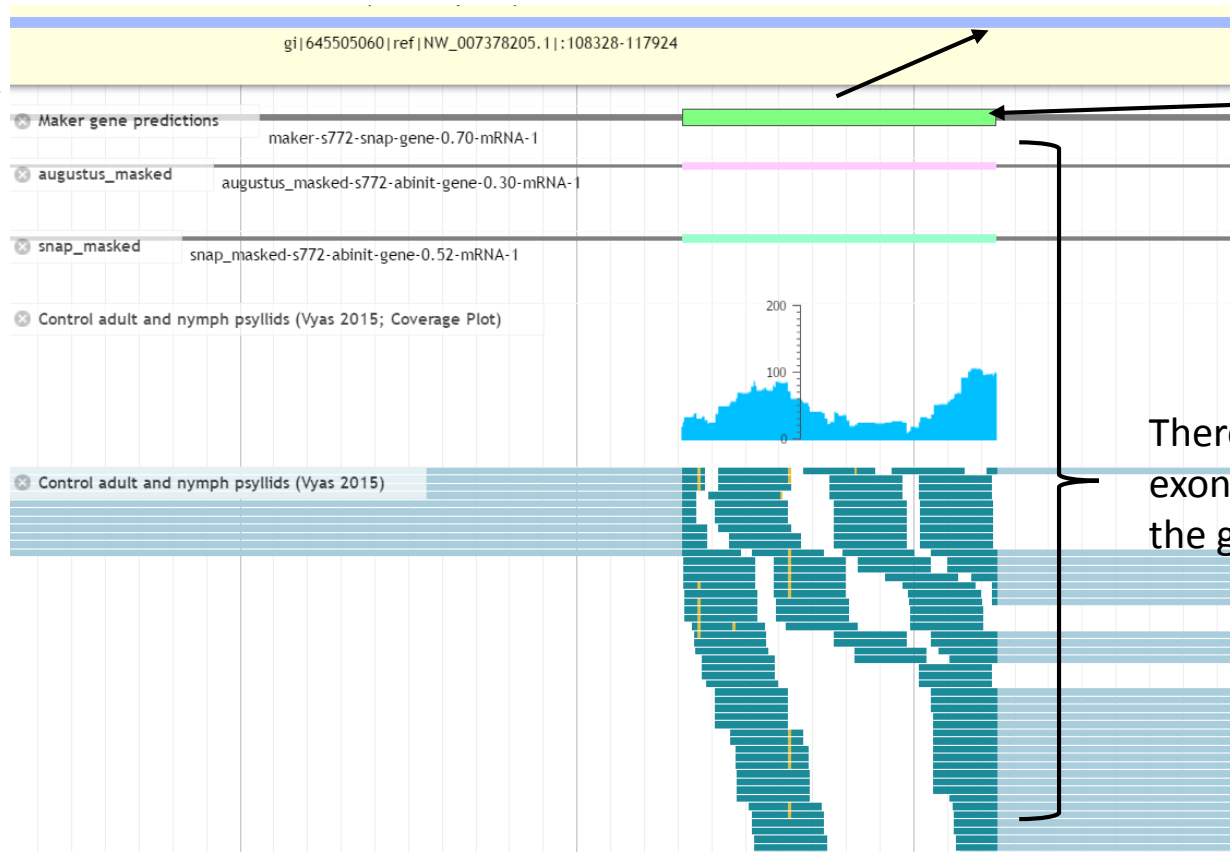

Click and drag exon on top of gene model and drop.

There is evidence that an exon should be added to the gene model

After

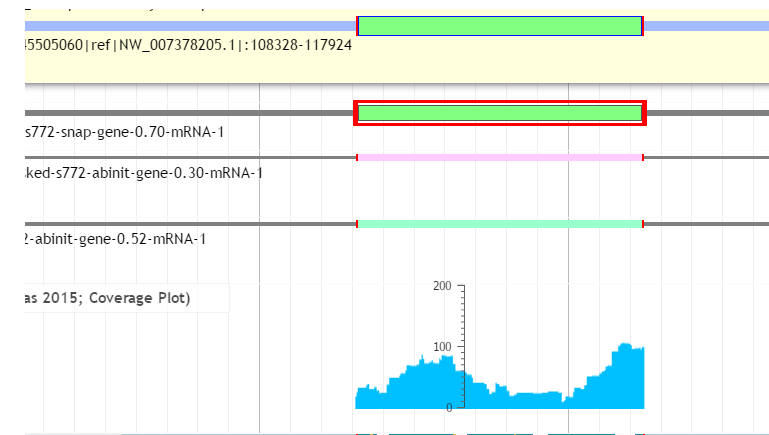

# Isoforms

When the gene can undergo alternative splicing

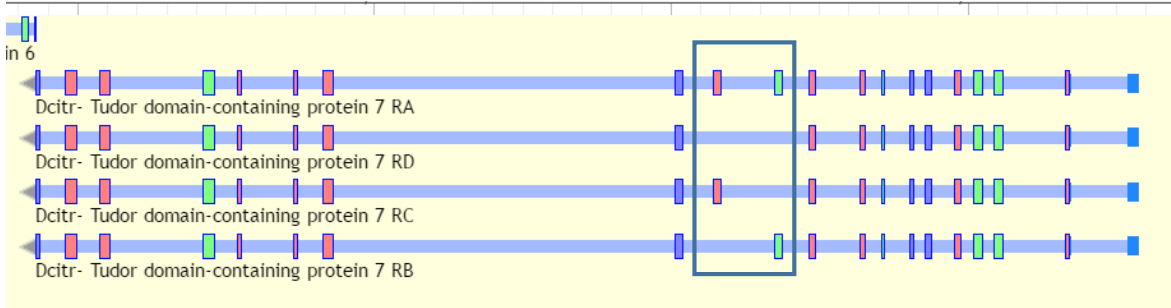

RNAseq reads indicate intron and exon evidence for the same part of the model.

If there were many results containing isoforms when the gene model was initially blasted on NCBI, this is good evidence for isoforms as well.

If you have evidence for isoforms, right click your gene model in the “user-created annotations” space, and duplicate.

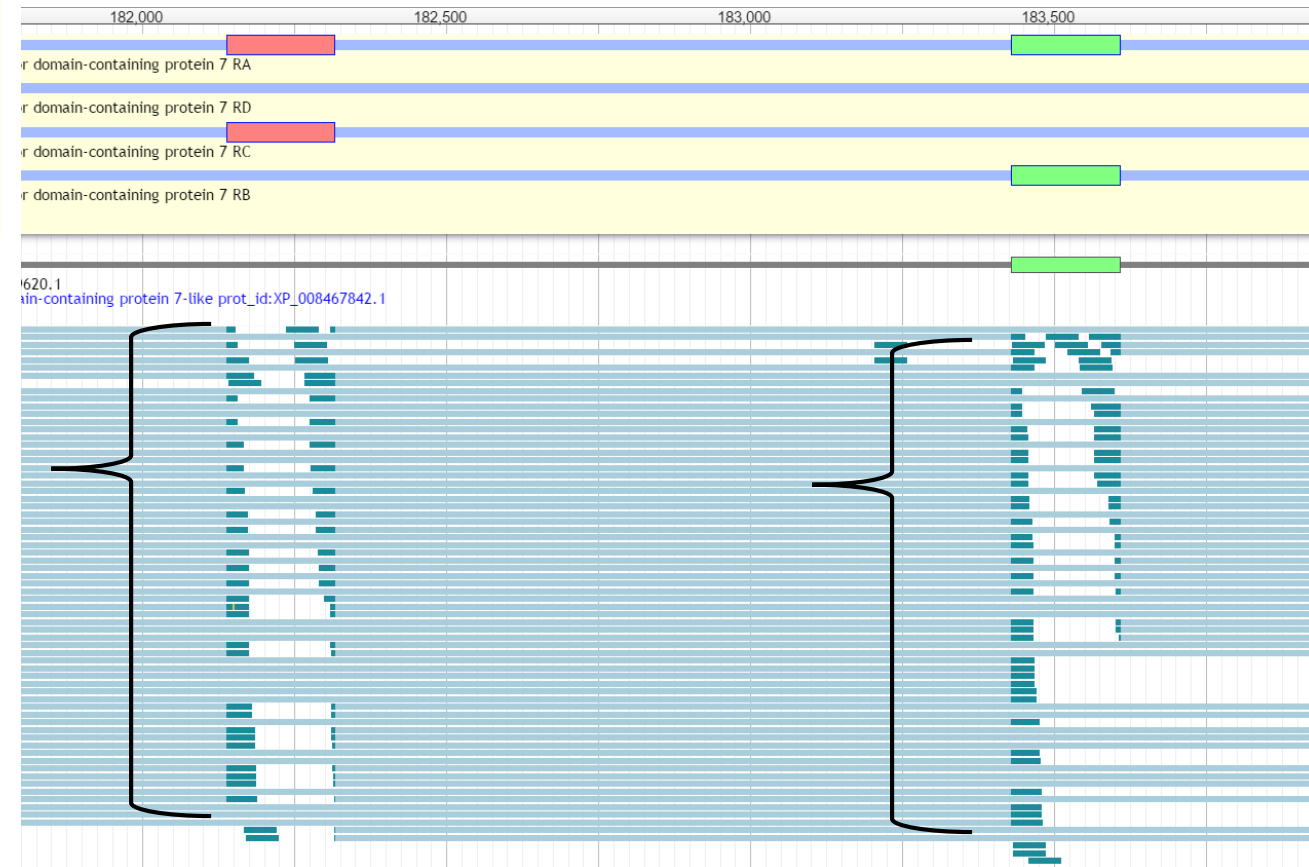

# Edited Gene Models

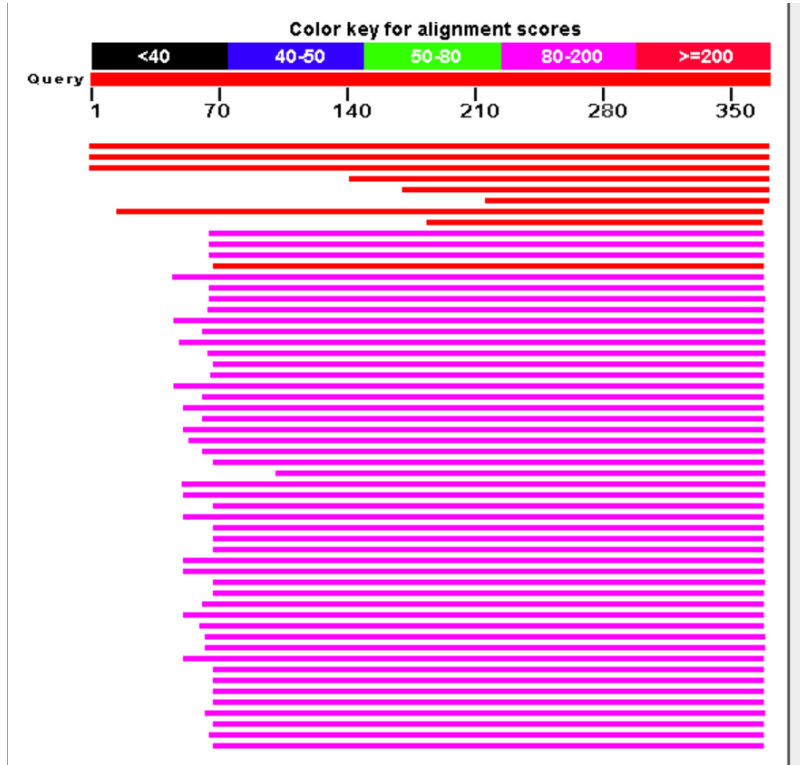

Predicted Model Conserved domain results

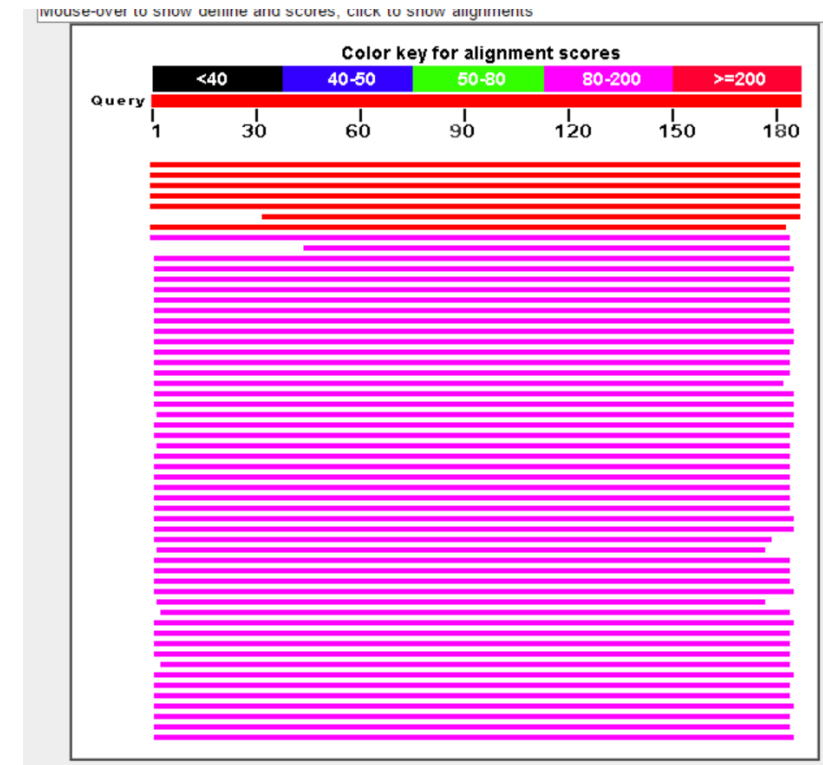

Conserved domain results after matching your gene model with RNASeq data

After a change is made, check your results using the BLASTp or Smart BLAST again

# Information editor

Right click on the model in the User Created section and choose “Edit Information”

The screenshot shows the 'Information Editor (alt-click)' window. It has a 'Select mRNA' dropdown at the top. Below it are two main panels: 'gene' on the left and 'mRNA' on the right. Each panel has fields for Name, Symbol, Description, Created, and Last modified. Below these are 'Status' buttons (Approved, Delete) and a 'DBXRefs' table with columns 'DB' and 'Accession'. At the bottom of each panel is a 'Replaced Models' table with columns 'Action' and 'Transcript Name'. In the 'mRNA' panel, the 'Replaced Models' table contains one entry: 'replace' with 'XM\_008472813.1'. Blue arrows point from the explanatory text on the right to various fields in both panels.

| gene                                                                  |                                     |
|-----------------------------------------------------------------------|-------------------------------------|
| Name                                                                  | Dcitr_cathepsin B-like 1 prot ISO 2 |
| Symbol                                                                |                                     |
| Description                                                           |                                     |
| Created                                                               | 2015-12-17                          |
| Last modified                                                         | 2016-11-04                          |
| Status<br><input type="radio"/> Approved <input type="radio"/> Delete |                                     |
| DBXRefs                                                               |                                     |
| DB                                                                    | Accession                           |
| Add Delete                                                            |                                     |
| Replaced Models                                                       |                                     |
| Action                                                                | Transcript Name                     |
| replace                                                               | XM_008472813.1                      |

| mRNA                                                                             |                                     |
|----------------------------------------------------------------------------------|-------------------------------------|
| Name                                                                             | Dcitr_cathepsin B-like 1 prot ISO 2 |
| Symbol                                                                           |                                     |
| Description                                                                      |                                     |
| Created                                                                          | 2015-12-17                          |
| Last modified                                                                    | 2016-01-28                          |
| Status<br><input checked="" type="radio"/> Approved <input type="radio"/> Delete |                                     |
| DBXRefs                                                                          |                                     |
| DB                                                                               | Accession                           |
| Add Delete                                                                       |                                     |
| Replaced Models                                                                  |                                     |
| Action                                                                           | Transcript Name                     |
| replace                                                                          | XM_008472813.1                      |

Name of the gene. **Do NOT use Dcitr**

Symbol or abbreviation of the gene

Description of the gene, usually function. Uniprot is a good source.

Click approved once all edits are made and your gene model is complete

You will need the name of the original model that your annotation will be replacing

Example:

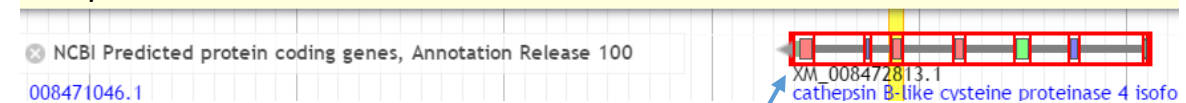

mRNA XM\_008472813.1

Primary Data

Name XM\_008472813.1

Type mRNA

Description cathepsin B-like cysteine proteina

Right click on model > View details

Fill in both sections: Gene and mRNA panels

# Information editor cont'd

Information editor interface showing two panels. Each panel has a top section with an 'Add' button and a 'Delete' button. Below is a 'Comments' section with a text area and 'Add'/'Delete' buttons. The right-hand 'Comments' section contains two entries:

- NCBI model. RNA Seq data avail. BLAST match with high query and ID.
- Pairwise BLAST to "Dcitr\_cathepsin B-like 1 prot" shows 84% query and 43% ID

Here you will enter comments about all the edits (splice sites moved, added exons, deleted exons, etc.) made to your gene model and other relevant info.

## Naming isoforms:

Naming isoforms interface showing two panels. The left panel shows the 'gene' section with fields for Name, Symbol, Description, Created, Last modified, and Status. The right panel shows the 'mRNA' section with fields for Name, Symbol, Description, Created, Last modified, and Status. The 'mRNA' section for the second isoform has a blue arrow pointing to the 'Name' field.

gene

Name: Dcitr- Tudor domain-containing pr  
Symbol: TDRD7  
Description: involved in post-transcriptional reg  
Created: 2015-10-02  
Last modified: 2015-11-05  
Status: ☒ Approved ☐ Delete

mRNA

Name: ntaining protein 7 RA  
Symbol: TDRD7  
Description: involved in post-transcriptional reg  
Created: 2015-10-02  
Last modified: 2017-02-15  
Status: ☒ Approved ☐ Delete

gene

Name: Dcitr- Tudor domain-containing pr  
Symbol: TDRD7  
Description: involved in post-transcriptional reg  
Created: 2015-10-02  
Last modified: 2015-11-05  
Status: ☒ Approved ☐ Delete

mRNA

Name: domain-containing protein 7 RB  
Symbol: TDRD7  
Description: involved in post-transcriptional reg  
Created: 2015-11-02  
Last modified: 2017-02-15  
Status: ☒ Approved ☐ Delete

Naming convention for isoforms should have RA, RB, RC, etc. at the end for each isoform you have, respectively. (look at slide 20)

The gene section should be the same for all isoforms.

But the mRNA section should be different for all isoforms, comments should contain the edits made for the particular isoform clicked on.

# Gene Family Report

Once your gene or gene family is annotated, the gene report should include:

- Introduction to the gene or gene family including the pathway (use literature)
- Methods of annotation and phylogenetic analysis
- Results and Discussion (use literature)
- References cited

# Tables to include in report

## Table with gene count in:

- *Drosophila melanogaster*
- *Anopheles gambiae*
- *Tribolium castaneum*
- *Apis mellifera*
- *Nasonia vitripennis*
- *Acyrtosiphon pisum*
- *Bemisia tabaci*

## Table with blast match:

- Indicate organism and name of gene
- Query coverage
- % identity
- Bit score

Include legend for each table.

# Comparative and Phylogenetic Analysis

When your gene model(s) are completed, perform analysis in MEGA.

1. Construct tree with *D. citri* gene models only.
2. Construct tree with *D. citri* gene models and orthologs. Use related sequences from, but not limited to,
  - *Drosophila melanogaster*
  - *Anopheles gambiae*
  - *Tribolium castaneum*
  - *Apis mellifera*
  - *Nasonia vitripennis*
  - *Acyrtosiphon pisum*
  - *Bemisia tabaci*

Can find orthologous sequences in NCBI, Ensembl, Uniprot, etc.

# Multiple Sequence Alignments (MSA)

Multiple sequence alignments should be generated using MUSCLE, tcoffee, or clustal to compare the ACP gene model to the query gene set. The final model should be refined in Apollo using homology, RNAseq and proteomics evidence tracks.

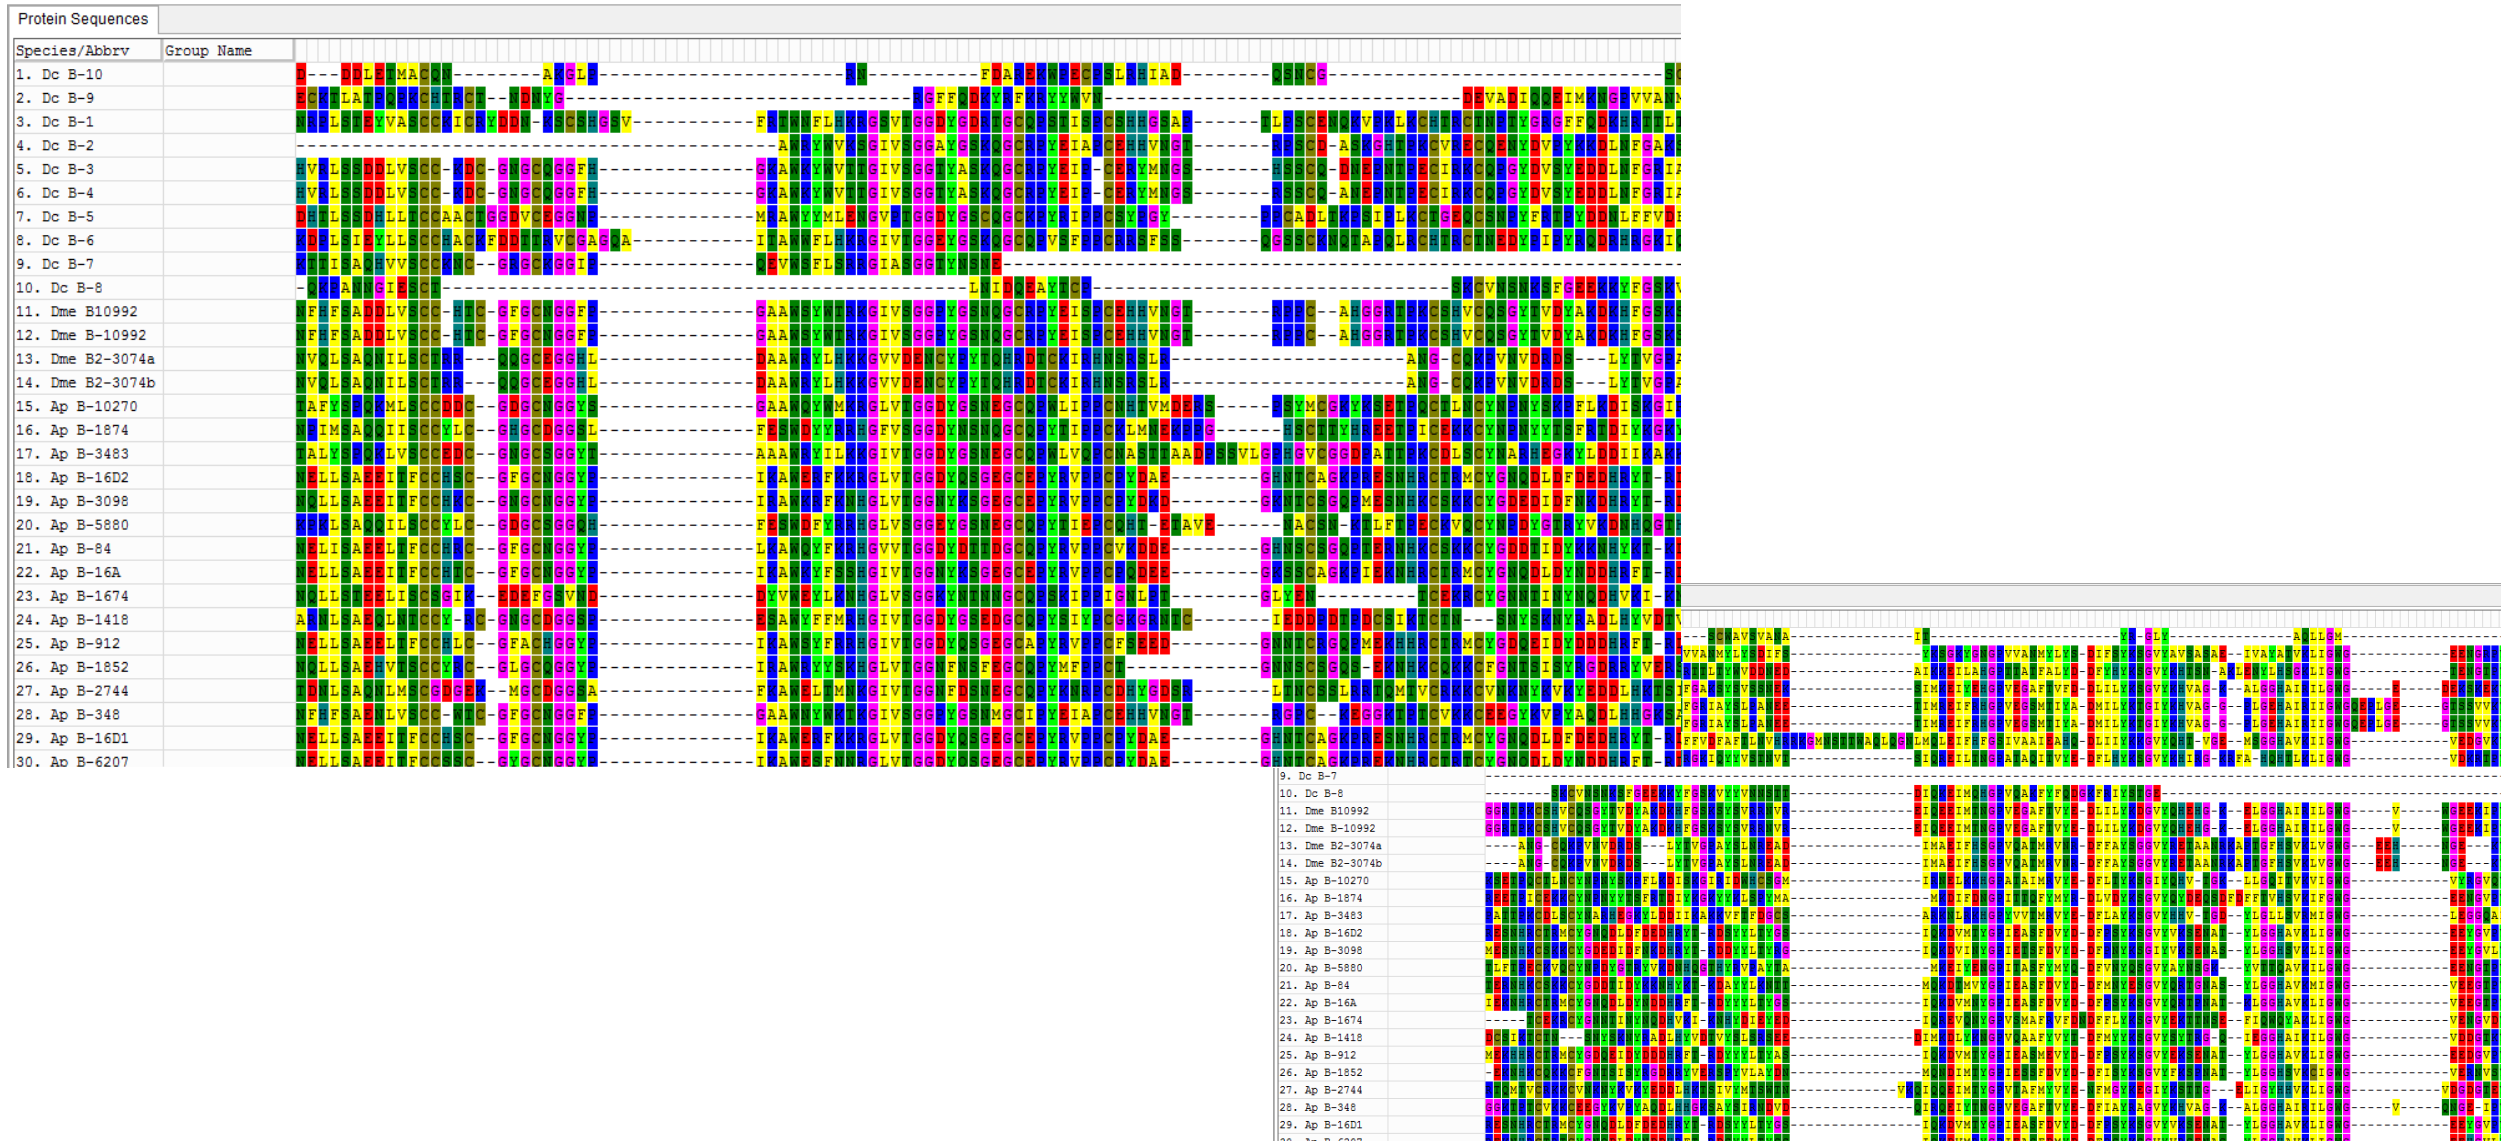

# Tree of all *D. citri* gene models

This would include all genes (paralogs) for the particular family annotated in the genome.

Example:

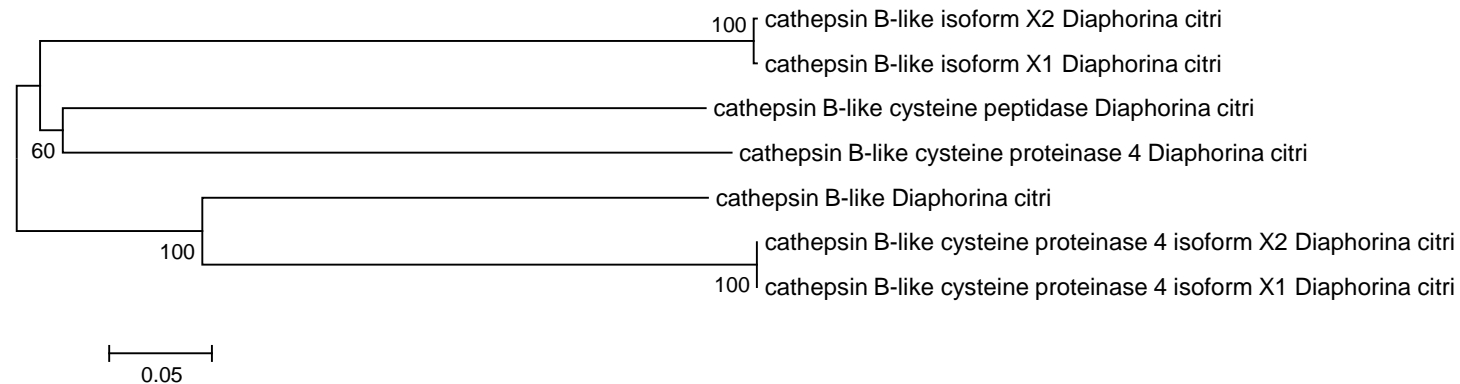

Tree should be included in report with legend.

# Tree of all *D. citri* gene models and other orthologs

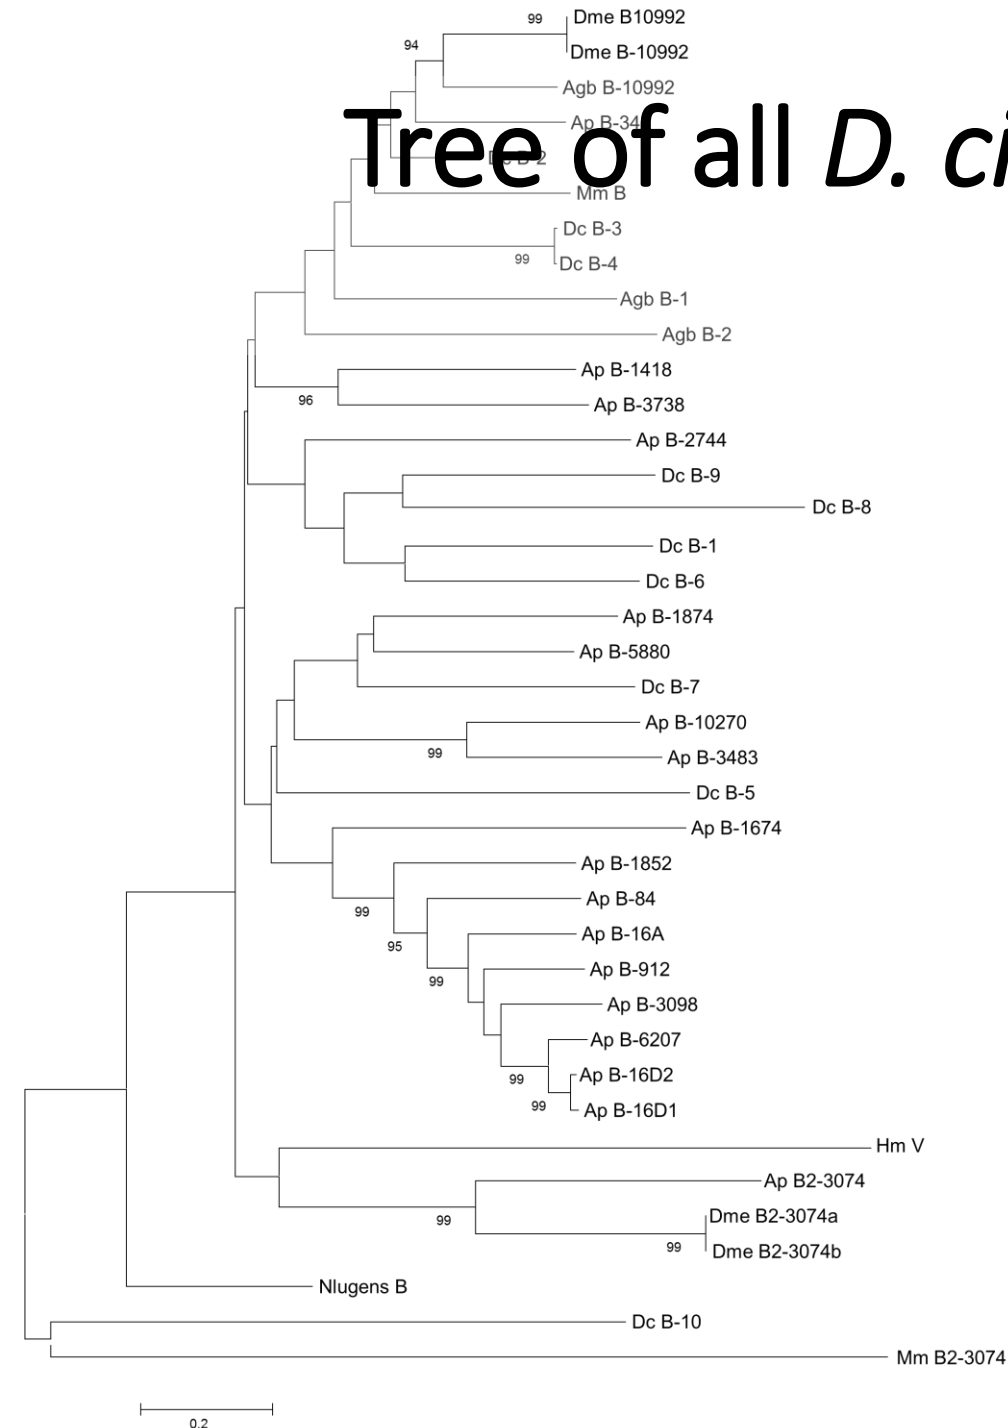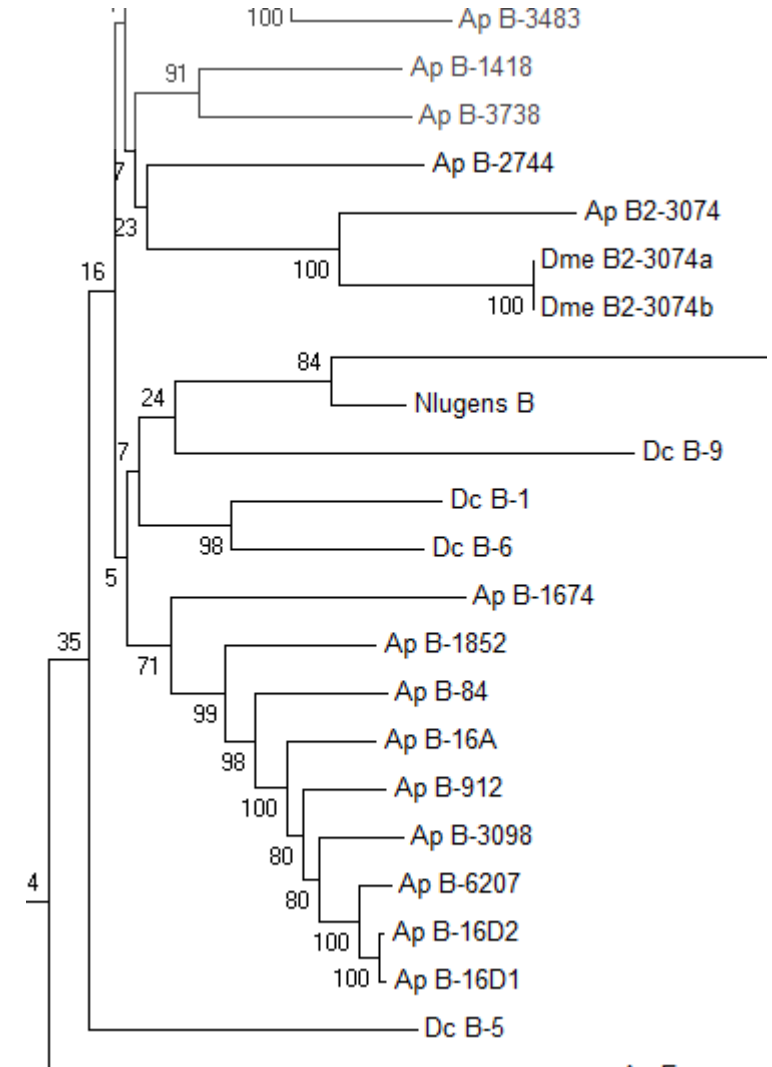

Tree should be included in report with legend

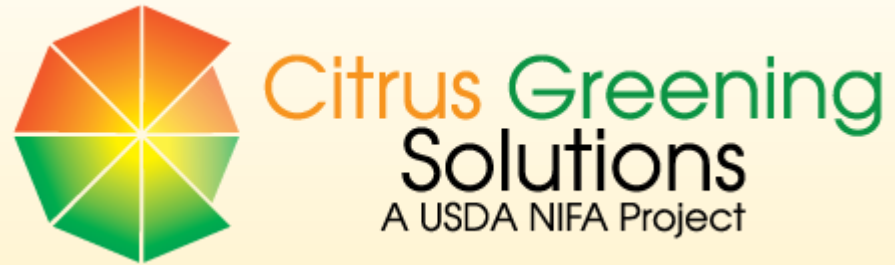

Krystal Villalobos Ayala

Chris Cordola

Tracey Bell

Hannah Mann

Daniel DeAvila

Gabe DeAvila

Tom D'elia

Indian River State College, FL
