# Supplementary material for: Improved annotation of the insect vector of citrus greening disease: biocuration by a diverse genomics community
Source: Oxford University Press journal article supplement (doi:10.1093/database/bax032), 2017-01-01
Supplement: bax032_supp.zip [file bax032_supp.zip]

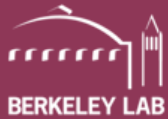

**BERKELEY LAB**  
LAWRENCE BERKELEY NATIONAL LABORATORY

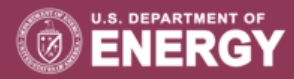

# Apollo Annotation Guidelines for i5k Projects

*Diaphorina citri*

Monica Munoz-Torres | @monimunozto

Berkeley Bioinformatics Open-Source Projects (BBOP)  
Environmental Genomics & Systems Biology Division  
Lawrence Berkeley National Laboratory

i5k Pilot Project Species | 16 February, 2016

<http://GenomeArchitect.org>

# General process of curation

1. Select or find a **region of interest**, e.g. scaffold.
2. Select appropriate **evidence** tracks to review the gene model.
3. Determine whether a feature in an existing evidence track will provide a reasonable **gene model to start** working.
4. If necessary, **adjust** the gene model.
5. Check your edited gene model for **integrity and accuracy** by comparing it with available homologs.
6. **Comment.**

# Collaborative curation at i5k

1. The Apollo User Guide is available at [http://genomearchitect.org/web\\_apollo\\_user\\_guide](http://genomearchitect.org/web_apollo_user_guide)
2. Specific guidelines for i5k Pilot Species Projects are available at the i5k Workspace@NAL <https://goo.gl/9R0J4E>
3. A computationally predicted consensus gene set has been generated using multiple lines of evidence. E.g. *HVIT\_v0.5.3-Models* or *MAKER gene predictions*.
4. In some cases algorithms and metrics used to generate consensus sets may actually reduce the accuracy of the gene's representation. Use your judgment, try choosing a different model to begin the annotation.
5. If an annotation needs to be removed from the consensus set, drag it to the '**User-created Annotations**' area and label as '**Delete**' using the radio button in the the *Information Editor*.
6. **Annotate isoforms when possible:** drag the original model and also annotate all alternatively spliced forms in '**User-created Annotations**' area. '**Replace Models**' rules apply.
7. i5k Projects will integrate consensus computational predictions with manual annotations to produce an updated Official Gene Set (OGS):  
**Warning!**
  - If an annotation is on either the consensus or manual annotations tracks and it shouldn't, it will make the OGS!
  - If annotation is not on either track, it won't make the OGS!
8. Collaborate to reach agreement on overlapping interests.

# What does it take to initiate an annotation?

After locating your gene or region of interest, add as many gene prediction and evidence tracks as you consider necessary to inform your annotation by clicking on and off from the list of '*Available Tracks*' on the left. Scroll through the different tracks of gene predictions and choose one that you consider most closely reflects the actual structure of the gene. You may base your decision on prior knowledge of the reliability of each gene prediction track (e.g., select an evidence-based gene model instead of an *ab initio* gene prediction). Alternatively, you may compare the gene prediction tracks to a BLAST alignment or other aligned data (e.g.: alignments of protein homologs, cDNAs and, RNAseq reads). Drag the highlighted model or all pieces of evidence into the '*User-created Annotations*' area.

You may then download the amino acid sequence (*Right Click Menu / Get Sequence*) to query a public database and help you determine if the selected gene model is, biologically speaking, an accurate approximation to the gene. For example, you may perform a protein sequence search of UniProt or NCBI's non-redundant peptide database, NR. If you have knowledge of protein domains in your gene of interest, you may perform a protein domain search of the InterPro databases or NCBI's Conserved Domain Database to verify that your selected gene model contains the expected domains.

Once a gene model is selected as the best starting point for annotation, the annotator must decide whether it needs further modification. Protein or domain database searches may have already informed this decision. Scroll down the evidence tracks to see if splice sites in transcript alignments agree with the selected gene model, or if evidence suggests addition or modification of an exon is necessary. Transcript alignments (e.g. cDNA/EST/RNAseq tracks) that are significantly longer than the gene model may indicate the presence of additional coding sequence or untranslated regions (UTRs). Keep in mind that transcript alignments may be shorter than the gene model due to the fragmented nature of current transcript sequencing technologies. Similarly, protein alignments may not reflect the entire length of the coding region because divergent regions may not align well, resulting in a short protein alignment or one with gaps. Protein and transcript alignments in regions with tandem, closely related genes might also be problematic, with partial alignments to one gene, then skipping over to align the rest to a second gene. More at [http://genomearchitect.org/web\\_apollo\\_user\\_guide](http://genomearchitect.org/web_apollo_user_guide)

# Checklist

## for manual annotation of a gene model

1. Check, correct or add '**Start**' and '**Stop**' sites.
2. Check **splice sites**: most splice sites display these residues  
**5'...exon]GT...intron...AG[exon...-3'**
3. Check if you can annotate **UTRs**, for example using RNA-Seq data:
  - align it against relevant genes/gene family
  - blastp against NCBI's RefSeq or NCBI nr
4. Check and note **gaps** in the assembly.
5. Add supporting details to the **Annotation Information Editor**.  
(See next page).

# Annotation Information Editor

- Add supporting details to each box in the Information Editor.
    - Begin adding information by clicking the ‘Add’ button and typing.
    - A click outside the box saves this information automatically.
    - Another click on the box allows you to edit the information.
    - The ‘Delete’ button removes the entry.
1. Add comments documenting how you modified the automated gene predictions. E.g.:
    - **merging** 2 gene predictions in the same scaffold
    - gene prediction spans **across 2 or more scaffolds**
    - **splitting** a gene prediction
    - annotating **frameshifts**, annotating selenocysteines, correcting single-base and other assembly errors, etc.
  2. Also add comments with important project information.
  3. Add gene symbol(s), common name(s), synonyms on the top boxes.
  4. Use ‘**DBXRef**’ to add IDs from public databases (e.g. NCBI’s GenBank) for the gene of interest in this species and also for orthologs from other species, top BLAST hits, etc.
  5. Add any appropriate functional assignments obtained via BLAST, RNA-Seq data, literature searches, etc., using ‘**Gene Ontology IDs**’.
  6. Follow the rules for ‘**Replaced Models**’, when applicable.

# Annotation Information Editor

## Example

The screenshot shows the Apollo Annotation Information Editor interface. The top menu bar includes File, View, Tools, and Help. The main window is titled 'Information Editor' and has a 'Full-screen view' button and a user icon labeled 'mcm'. A dropdown menu shows 'Select mRNA' with the value 'Apurinic-Apyrimidinic Endonuclease-00002'. The interface is split into two columns: 'gene' and 'mRNA'. Both columns have identical fields for Name, Symbol, Description, Created, and Last modified, all with the value 'Apurinic-Apyrimidinic Endonuclease-00002'. Below these are status options: 'Approved' (radio button) and 'Needs Review' (radio button, selected). There are also 'Delete' buttons. Below the status is a 'DBXRefs' table with columns 'DB' and 'Accession'. The 'mRNA' column has two rows: 'WormBase' with 'WB\_0001234' and 'FlyBase' with 'FB\_00004567'. Below the table are 'Add' and 'Delete' buttons. At the bottom is a 'Replaced Models' table with columns 'Action' and 'Transcript Name'. The 'mRNA' column has one row: 'replace' with 'Enter new value'. Below the table are 'Add' and 'Delete' buttons. The Apollo logo is visible in the bottom left corner.

The screenshot shows a dropdown menu for 'Gene Ontology IDs'. The selected item is 'GO:0000725'. The list of items includes: 'recombinational repair [GO:0000725]', 'dopamine neurotransmitter receptor activity, coupled via Gi/Go [GO:0001591]', 'nuclear-transcribed mRNA catabolic process, no-go decay [GO:0070966]', and 'GINS complex [GO:0000811]'.

The screenshot shows a dropdown menu for 'Comments'. The selected item is 'My favorite Gene'. The list of items includes: 'Needs more data', 'Result of modifying gene model:', and 'Result of merging two genes'. Below the dropdown are 'Add' and 'Delete' buttons.

### Remember:

- Add **PubMed IDs** from publications used to support your annotations.
- Include **Gene Ontology** terms as appropriate from any of the three ontologies.
- Write comments stating how you have validated each model.

# The 'Replace Models' rules

Explanations and examples for how to enter information in the 'Replace Models' field are available at i5k Workspace@NAL.

Visit <http://tinyurl.com/apollo-i5k-replace>

The screenshot displays the Apollo Information Editor interface, which is split into two panes: 'gene' and 'mRNA'. Both panes show the same metadata for 'Apurinic-Apyrimidinic Endonuclease-00002', including Name, Symbol (Apex-1), Description (Multifunctional DNA Repair Enzyme), and creation/modification dates (2015-07-26). The 'Status' section for both has radio buttons for 'Approved', 'Needs Review' (selected), and 'Delete'. The 'DBXRefs' table lists 'WormBase' (WB\_0001234) and 'FlyBase' (FB\_00004567). At the bottom, the 'Replaced Models' table is shown. A yellow dashed arrow points to the 'replace' action in the 'Replaced Models' table, which has the value 'Enter new value' in the 'Transcript Name' column. The 'Add' and 'Delete' buttons are visible at the bottom of the table.

Information Editor

Select mRNA: Apurinic-Apyrimidinic Endonuclease-00002

**gene**

Name: Apurinic-Apyrimidinic Endonuclease-00002  
Symbol: Apex-1  
Description: Multifunctional DNA Repair Enzyme  
Created: 2015-07-26  
Last modified: 2015-07-26

Status

☐ Approved ☒ Needs Review ☐ Delete

DBXRefs

| DB       | Accession   |
|----------|-------------|
| WormBase | WB_0001234  |
| FlyBase  | FB_00004567 |

Add Delete

**Replaced Models**

| Action  | Transcript Name |
|---------|-----------------|
| replace | Enter new value |

Add Delete

**mRNA**

Name: Apurinic-Apyrimidinic Endonuclease-00002  
Symbol: Apex-1  
Description: Multifunctional DNA Repair Enzyme  
Created: 2015-07-26  
Last modified: 2015-07-26

Status

☐ Approved ☒ Needs Review ☐ Delete

DBXRefs

| DB       | Accession   |
|----------|-------------|
| WormBase | WB_0001234  |
| FlyBase  | FB_00004567 |

Add Delete

**Replaced Models**

| Action  | Transcript Name |
|---------|-----------------|
| replace | Enter new value |

Add Delete



# The *Diaphorina citri* research community

- **Apollo instance for *Diaphorina citri*** at i5k Workspace@NAL:  
<https://apollo.nal.usda.gov/diacit/sequences>
- All annotations from Apollo should also be added to the **Citrus Psyllid Gene Annotation Workbook**, our shared spreadsheet available on Google Drive at <https://goo.gl/dd7c2U>
- ***Diaphorina citri* Project Page** at i5k Workspace@NAL:  
[https://i5k.nal.usda.gov/Diaphorina\\_citri](https://i5k.nal.usda.gov/Diaphorina_citri)
- Details about the the USDA NIFA citrus greening project are available at <http://goo.gl/H41Cxl>
- Our **Documentation Management System** – Basecamp is available at <https://goo.gl/I0agUK>  
Please request access from Ms. Kascha Bohnenblust at [kascha@ksu.edu](mailto:kascha@ksu.edu)
