# Supplementary material for: Improved annotation of the insect vector of citrus greening disease: biocuration by a diverse genomics community
Source: Oxford University Press journal article supplement (doi:10.1093/database/bax032), 2017-01-01
Supplement: bax032_supp.zip [file bax032_supp.zip]

## Supplementary Table 6

Counts of responses to pre- and post- questions for University of Cincinnati students about annotation and

| No. | Question                                                                                                      |
|-----|---------------------------------------------------------------------------------------------------------------|
| 1   | What are some major difficulties associated with genome sequencing and assembly?                              |
|     | <b>Correct answers included three or more of the following points:</b>                                        |
|     | A. Obtaining research funds for sequencing                                                                    |
|     | B. Recovery of enough DNA for inbred lines or large individuals necessary for sequencing                      |
|     | C. Proper sequencing depth for assembly                                                                       |
|     | D. Computing time and power for assembly                                                                      |
|     | E. Adequate assessment of genome assembly quality                                                             |
|     | F. Sex-specific bias                                                                                          |
|     | G. Assignment of genome scaffolds to chromosomes                                                              |
|     | H. Accurate gene prediction.                                                                                  |
|     | I. Removal of chimeras and/or microbial contamination                                                         |
|     | difficulties associated with genome assembly                                                                  |
|     |                                                                                                               |
| 2   | What information is utilized to predict genes in a newly assembled genome?                                    |
|     | <b>Correct answers included three or more of the following points:</b>                                        |
|     | A. Previously sequenced gene in NCBI                                                                          |
|     | B. RNA seq data                                                                                               |
|     | C. <i>de novo</i> assemblies, such as those from Trinity or Oases                                             |
|     | D. Proteins/gene sequences in other organism                                                                  |
|     | E. Known characteristics of transcriptional start and stop sites.                                             |
|     | F. Known characteristics of splice sites                                                                      |
|     | G. ORF prediction software                                                                                    |
|     | *Other answers are acceptable if these indicate the student understands the process of gene prediction        |
|     |                                                                                                               |
| 3   | How does a sequenced genome increase tools available for research on an organism?                             |
|     | <b>Correct answers included two or more of the following points:</b>                                          |
|     | A. Studies on transcriptional regulation through transcription factors is possible.                           |
|     | B. DNA methylation studies can be conducted.                                                                  |
|     | C. Splice variants in genes can be examined.                                                                  |
|     | D. Development of transgenic lines can more accurate by reducing off-target effects.                          |
|     | E. RNA interference can be developed to target specific splice variants                                       |
|     | F. Studies assessing the presence or absence of genes can be more accurate                                    |
|     | G. Potential interplay between hosts and symbionts can be examined by looking at the gene repertoire.         |
|     | *Other answers are acceptable if these indicate the student can justify why the genome will improve research. |

bioinformatics. Note: Not all students completed the pre- and post-test resulting on only 22 students that c

[illegible]

could be assessed.
